# Supplementary material for: Plexin-B2 controls the timing of differentiation and the motility of cerebellar granule neurons
Source: eLife. 2021 Jun 8;10:e60554. doi: 10.7554/eLife.60554 (PMC8211449; doi:10.7554/eLife.60554)
Supplement: Figure 3—figure supplement 1—source data 1. [file elife-60554-fig3-figsupp1-data1.xlsx]

## Sheet: Fig3 S1-A
Figure3 Supplement1-A	Cerebellar volume 3D
	P4		P30
genotype	PlxnB2fl/fl	En1cre;Plxnb2fl/fl	PlxnB2fl/fl	En1cre;Plxnb2fl/fl
normalized volume (% from wt)	100	94.3	100	80.3257
	100	71.7	100	91.8567
	100	79.6	100	81.5959
	100	94.6	100	84.3
	100	88	100	85.8
			100	80.3
Number of values	5	5	6	6
Minimum	100	71.7	100	80.3
25% Percentile	100	75.65	100	80.32
Median	100	88	100	82.95
75% Percentile	100	94.45	100	87.31
Maximum	100	94.6	100	91.86
Mean	100	85.64	100	84.03
Std. Deviation	0	9.895	0	4.428
Std. Error of Mean	0	4.425	0	1.808

## Sheet: Fig3 S1-B
Figure3 Supplement1-B	Rotarod test
	day1		day2		day3
genotype	PlxnB2fl/fl	En1cre;Plxnb2fl/fl	PlxnB2fl/fl	En1cre;Plxnb2fl/fl	PlxnB2fl/fl	En1cre;Plxnb2fl/fl
time on rotarod (seconds)	132.25	113	127	158.5	95.5	149.25
	187.5	199.75	200	210.75	212.75	227.5
	96.5	157	141.75	157.25	156.5	202.5
	209.5	109	186.5	139	225.5	239.5
	142.75	128.25	179.75	178	194	171
	139	144.75	98.75	213.25	128.25	224.25
		102.25		166.75		174.5
		139		148.5		167.5
		96		121		119.25
		136.75		204.5		223.5
19 weeks old	1 male, 5 females	5 males, 5 females
Number of values	6	10	6	10	6	10
Minimum	96.5	96	98.75	121	95.5	119.3
25% Percentile	123.3	107.3	119.9	146.1	120.1	162.9
Median	140.9	132.5	160.8	162.6	175.3	188.5
75% Percentile	193	147.8	189.9	206.1	215.9	225.1
Maximum	209.5	199.8	200	213.3	225.5	239.5
Range	113	103.8	101.3	92.25	130	120.3
Mean	151.3	132.6	155.6	169.8	168.8	189.9
Std. Deviation	40.71	30.79	39.37	31.47	50.89	39.56
Std. Error of Mean	16.62	9.736	16.07	9.952	20.78	12.51
