# Supplementary material for: Plexin-B2 controls the timing of differentiation and the motility of cerebellar granule neurons
Source: eLife. 2021 Jun 8;10:e60554. doi: 10.7554/eLife.60554 (PMC8211449; doi:10.7554/eLife.60554)
Supplement: Figure 4—figure supplement 1—source data 1. [file elife-60554-fig4-figsupp1-data1.xlsx]

## Sheet: Fig4 S1-A
Figure 4 Supplement 1-A	Amount of labeled cells per um3 EGL
	EdU 2h after injection		EdU 24h after injection		H3P
genotype	PlxnB2fl/fl	En1cre;Plxnb2fl/fl	PlxnB2fl/fl	En1cre;Plxnb2fl/fl	PlxnB2fl/fl	En1cre;Plxnb2fl/fl
count of labeled cells/ um3 of DAPI segmented EGL	0.000926572	0.000838998	0.00163	0.0015	0.000304	0.000353
	0.000974911	0.000917589	0.00198	0.00171	0.000335	0.000345
	0.00134447	0.00100311	0.0015	0.00132	0.000101	0.000305
	0.00083133	0.000842054	0.00126	0.00168	8.81e-05	0.000256
	0.000971976	0.000871687	0.00137	0.00135	0.000144	0.000202
age of tissue	P8		P9		P9
Number of values	5	5	5	5	5	5
Minimum	0.0008313	0.000839	0.00126	0.00132	8.81e-05	0.000202
25% Percentile	0.000879	0.0008405	0.001315	0.001335	9.455e-05	0.000229
Median	0.000972	0.0008717	0.0015	0.0015	0.000144	0.000305
75% Percentile	0.00116	0.0009604	0.001805	0.001695	0.0003195	0.000349
Maximum	0.001344	0.001003	0.00198	0.00171	0.000335	0.000353
Mean	0.00101	0.0008947	0.001548	0.001512	0.0001944	0.0002922
Std. Deviation	0.0001959	6.834e-05	0.0002785	0.0001807	0.0001166	6.343e-05
Std. Error of Mean	8.759e-05	3.056e-05	0.0001246	8.083e-05	5.213e-05	2.837e-05

## Sheet: Fig4 S1-B
Figure 4 Supplement 1-A	EdU/Ki67 colocalization
genotype	PlxnB2fl/fl	En1cre;Plxnb2fl/fl
% of EDU cells in EGL that is also positive for Ki67 (averaged per animal)	66.0865	39.2758
	65.0135	50.1157
	43.7843	41.6731
	37.2779	64.1174
		63.8717
P8 animals
Number of values	4	5
Minimum	37	39
25% Percentile	38.75	40.5
Median	54.5	50
75% Percentile	65.75	64
Maximum	66	64
Range	29	25
Mean	53	51.8
Std. Deviation	14.72	11.84
Std. Error of Mean	7.36	5.295
