# Supplementary material for: Plexin-B2 controls the timing of differentiation and the motility of cerebellar granule neurons
Source: eLife. 2021 Jun 8;10:e60554. doi: 10.7554/eLife.60554 (PMC8211449; doi:10.7554/eLife.60554)
Supplement: Figure 4—source data 1. [file elife-60554-fig4-data1.xlsx]

## Sheet: Fig 4A
Fig 4A	Layer thickness
	EGL		oEGL		ML
genotype	PlxnB2fl/fl	En1cre;Plxnb2fl/fl	PlxnB2fl/fl	En1cre;Plxnb2fl/fl	PlxnB2fl/fl	En1cre;Plxnb2fl/fl
layer thickness (um)	47.6359	36.7717	23.1744	36.932	40.6655	30.4421
	51.8722	36.5933	26.2875	35.5648	43.204	28.7289
	47.8633	50.7575	28.1487	36.4751	43.7921	35.3712
	35.7108	46.6595	18.9008	32.51	32.3738	23.3439
	34.8995	42.918	18.754	38.5639	41.0301	31.2126
	42.3683	42.1625	22.7512	30.2547	40.0506	22.1471
	43.1382	55.5239	28.3006	45.8694	26.5028	18.8298
	36.9083	34.6255	23.4828	29.0336	28.4905	25.6678
	35.7684	26.6956	22.1871	23.6969	23.3826	30.0058
	38.7164	55.2071	32.8786	44.2739	30.0362	33.6494
	45.9703	43.5353	28.0289	28.2928	24.1289	14.442
	41.2483	30.9754	21.8392	20.012	20.0248	25.8876
	49.031	60.9305	23.7979	54.8909	23.9871	28.48
	36.8883	44.337	28.3997	35.908	30.8741	24.6988
	41.6611	48.4117	27.9193	39.3349	37.623	23.8837
	38.6709	41.0299	23.2888	35.1286	34.5385	27.9074
	31.8015	44.7621	14.1814	37.3138	28.6911	25.153
	45.2646	28.1967	21.0718	20.9578	33.3191	24.1739
	36.0232	65.0388	21.9933	54.24	33.4685	24.2417
	48.2021	50.1222	22.0137	36.7893	24.3715	21.0148
	51.8409	37.4374	24.6832	32.8025	26.418	20.9154
	40.9028	42.2144	23.495	36.3676	20.5094	17.9731
	52.0748	38.3984	28.9064	31.3701	27.1562	18.5136
	53.8731		30.5851		32.3407
	45.1883		25.5261		27.1155
	35.746		20.9432		29.3276
	41.7174		20.7875		35.1465
P9 tissue
Number of values	27	23	27	23	27	23
Minimum	31.8	26.7	14.18	20.01	20.02	14.44
25% Percentile	36.89	36.77	21.84	30.25	26.42	21.01
Median	41.72	42.92	23.48	35.91	30.04	24.7
75% Percentile	47.86	50.12	28.03	38.56	35.15	28.73
Maximum	53.87	65.04	32.88	54.89	43.79	35.37
Range	22.07	38.34	18.7	34.88	23.77	20.93
Mean	42.63	43.62	24.16	35.5	31.06	25.07
Std. Deviation	6.207	9.77	4.103	8.765	6.772	5.215
Std. Error of Mean	1.195	2.037	0.7896	1.828	1.303	1.087

## Sheet: Fig 4C
Fig 4C	EdU+ cells in EGL
genotype	PlxnB2fl/fl	En1cre;Plxnb2fl/fl
increase of EDU cells (quantified as #EDU+ cells/um3) from 2 to 24h (%)	166	168
	201	192
	153	147
	128	187
	139	150
P8 tissue
Number of values	5	5
Minimum	128	147
25% Percentile	133.5	148.5
Median	153	168
75% Percentile	183.5	189.5
Maximum	201	192
Mean	157.4	168.8
Std. Deviation	28.27	20.61
Std. Error of Mean	12.64	9.216

## Sheet: Fig 4D
Fig 4D	EdU+ and H3P+ cells in EGL
genotype	PlxnB2fl/fl	En1cre;Plxnb2fl/fl
amount of cells that is H3P+ AND EdU+ 24h after EdU injection (%)	2.96	5.28
	1.78	3.79
	1.71	10.2
	2.75	7
	3	5.98
P9 tissue
Number of values	5	5
Minimum	1.71	3.79
25% Percentile	1.745	4.535
Median	2.75	5.98
75% Percentile	2.98	8.6
Maximum	3	10.2
Mean	2.44	6.45
Std. Deviation	0.642	2.399
Std. Error of Mean	0.2871	1.073
