# Supplementary material for: Plexin-B2 controls the timing of differentiation and the motility of cerebellar granule neurons
Source: eLife. 2021 Jun 8;10:e60554. doi: 10.7554/eLife.60554 (PMC8211449; doi:10.7554/eLife.60554)
Supplement: Figure 5—figure supplement 1—source data 1. [file elife-60554-fig5-figsupp1-data1.xlsx]

## Sheet: Fig5 S1-A
Figure 5 Supplement1-A	Identity of electroporated cells
genotype	PlxnB2fl/fl AND En1cre;Plxnb2fl/fl
% of GFP+ CGNs that is also Pax6+, averaged per brain	100
	100
	99.2857
	98.3333
	100
	98.8506
	100
	100
	100
P9 brains, 48h post electroporation
Number of values	9
Minimum	98.33
25% Percentile	99.07
Median	100
75% Percentile	100
Maximum	100
Mean	99.61
Std. Deviation	0.6349
Std. Error of Mean	0.2116

## Sheet: Fig5 S1-B
Figure 5 Supplement1-B	Cell body dimensions GFP+ CGNs
	bipolar		unipolar		precursor
genotype	PlxnB2fl/fl	En1cre;Plxnb2fl/fl	PlxnB2fl/fl	En1cre;Plxnb2fl/fl	PlxnB2fl/fl	En1cre;Plxnb2fl/fl
cellbody width/length ratio	0.442824	0.503049	0.358324	0.263552	0.267983	0.394442
	0.452303	0.593385	0.473837	1.02174	0.49123	0.349717
	0.366359	0.41398	0.601665	0.431915	0.520597	0.545147
	0.284639	0.454916	0.330726	0.365708	0.424647	0.622053
	0.480962	0.427263	0.422813	0.540559	0.604608	0.669398
	0.49891	0.695774	0.329808	0.484816	0.650437	0.60955
	0.392146	0.917569	0.401525	0.379989	0.503745	0.471537
	0.411237	0.36175	0.274667	0.939405	0.670341	0.673608
	0.528018	0.483764	0.595111	0.613948	0.605652	0.646873
	0.535619	0.877154	0.512148	0.294435	0.588187	0.29872
	0.671339	0.463531	0.399601	0.350373	0.514343	0.629345
	0.440882	0.223893	0.280926	0.3162	0.588917	0.767613
	0.487543	0.647918	0.420004	0.426993	0.969188	0.618018
	0.33312	0.233313	0.471529	0.423114	0.659559	0.570839
	0.519621	0.34208	0.535374	0.34165	0.556916	0.581139
	0.407076	0.495514	0.380075	0.37522	0.493079	0.535166
	1.08781	0.398934		0.385561	0.679299	0.862767
	0.479387	0.264624		0.217163	0.872918	0.639243
	0.592449	0.360417		0.358911	0.396875	0.540587
	0.454269	0.546946		0.394972	0.398013	0.403439
	0.372081	0.459692		0.653838	0.803197	0.391832
	0.532517	0.539889		0.386091	0.820777	0.419847
	0.311137	0.458528		0.390698	0.785216	0.702897
	0.843916	0.340529		0.447931	0.856225	0.785402
	0.497692	0.664075		0.444803	0.490471	0.39648
	0.454054	0.472757		0.577918	0.327913	0.565518
	0.3926	0.437455		0.555499	0.55201	0.515317
	0.235772	0.405785		0.479895	0.646226	0.563702
	0.546436	0.227958		0.428155	0.622197	0.36356
	0.521311	0.386942		0.292894	0.78318	0.721816
	0.36947	0.394365		0.436767	0.875971	0.657947
	0.503203	0.42646		0.687913	0.508369
	0.438313	0.720314		0.465495	0.830619
	0.490161	0.471722		0.472633	0.389861
	0.467503	0.447764		0.384347	0.785864
	0.245657	0.355412		0.591639	0.718644
	0.571226	0.422921		0.47799	0.838019
	0.559502	0.602688		0.573983	0.471807
	0.437404	0.326497		0.639796	0.536672
	0.441055	0.378802		0.289388
	0.294564	0.412391		0.402043
	0.35819	0.365953		0.558377
	0.29605	0.568838		0.306015
	0.424277	0.447255		0.633188
		0.483868		0.813763
		0.685734		0.40504
		0.295092		0.48987
		0.837227		0.328784
		0.539364		0.594266
		0.463596		0.270867
		0.40631		0.442723
		0.436728		0.333552
		0.423188		0.515031
		0.268835		0.461207
		0.49191		0.458399
		0.370649
		0.44161
		0.309598
		0.562854
		0.270361
		0.431562
		0.340897
		0.310906
		0.31984
		0.36224
		0.363818
		0.423079
		0.356394
		0.23221
		0.472445
		0.264323
		0.391048
		0.516166
P8 brains, 24h post electroporation, 2h post EdU injection
Number of values	44	73	16	55	39	31
Minimum	0.2358	0.2239	0.2747	0.2172	0.268	0.2987
25% Percentile	0.3771	0.3584	0.3376	0.3657	0.4931	0.4198
Median	0.4532	0.4265	0.4108	0.4368	0.6046	0.5708
75% Percentile	0.5209	0.4937	0.5026	0.5555	0.7852	0.6579
Maximum	1.088	0.9176	0.6017	1.022	0.9692	0.8628
Range	0.852	0.6937	0.327	0.8046	0.7012	0.564
Mean	0.4652	0.4454	0.4243	0.4658	0.6179	0.565
Std. Deviation	0.1474	0.1436	0.1011	0.1569	0.1708	0.1395
Std. Error of Mean	0.02223	0.01681	0.02529	0.02115	0.02736	0.02505

## Sheet: Fig5 S1-C
Figure 5 Supplement1-C	Localization of electroporated CGNs
	EGL bin1		EGL bin2		ML
	% of all multipolar cells located in this bin		% of all bipolar cells located in this bin		% of all bipolar cells located in this bin
genotype	PlxnB2fl/fl	En1cre;Plxnb2fl/fl	PlxnB2fl/fl	En1cre;Plxnb2fl/fl	PlxnB2fl/fl	En1cre;Plxnb2fl/fl
% of GFP+ cells of a certain morphology located in this bin, averaged per brain	90.9091	69.8113	91.8033	47.6923	1.72414	23.0769
	94.1176	67.6923	86.7133	49.1228	1.79211	40.3509
	75.5556	73.5294	93.4211	54.321	0	24.6914
	90.7895	70.5882	96.2963	57.8125	0	23.4375
	93.8462		78.8136		12.0219
	80		94.2857		3.07692
P8 brains, 24h post electroporation, 2h post EdU injection
Number of values	6	4	6	4	6	4
Minimum	75.56	67.69	78.81	47.69	0	23.08
25% Percentile	78.89	68.22	84.74	48.05	0	23.17
Median	90.85	70.2	92.61	51.72	3.388	24.06
75% Percentile	93.91	72.79	94.79	56.94	8.947	36.44
Maximum	94.12	73.53	96.3	57.81	18.64	40.35
Range	18.56	5.837	17.48	10.12	18.64	17.27
Mean	87.54	70.41	90.22	52.24	5.189	27.89
Std. Deviation	7.816	2.416	6.459	4.683	6.952	8.337
Std. Error of Mean	3.191	1.208	2.637	2.341	2.838	4.168

## Sheet: Fig5 S1-E
Figure 5 Supplement1-E	CGN measurments: P7 -> P9 GFP+ CGN process length and cell body shape
	leading process		axon				cell body measurements
genotype	PlxnB2fl/fl	En1cre;Plxnb2fl/fl	PlxnB2fl/fl	En1cre;Plxnb2fl/fl		genotype	PlxnB2fl/fl	En1cre;Plxnb2fl/fl
process length (um)	31.435	35.949	37.212	49.783		cell body width/length ratio	0.513463	0.597943
	25.376	52.793	131.338	35.731			0.595265	0.811754
	21.085	113.863	108.712	9.248			0.43464	0.635816
	24.398	24.142	48.469	9.217			0.444055	0.358707
	19.335	19.54	16.48	23.269			0.401841	0.460203
	32.953	10.421	127.227	103.455			0.350968	0.46694
	40.794	6.994	27.962	72.016			0.620184	0.816901
	31.714	47.068	74.04	77.217			0.547825	0.520326
	32.454	32.295	93.677	6.269			0.640814	1.22388
	20.694	27.317	134.23	39.248			0.408347	0.555618
	25.437	23.291	67.099	30.607			0.461385	0.72865
	38.211	25.462	124.25	116.468			0.49383	0.941691
	29.669	13.703	69.524	16.503			0.57708	0.550414
	22.324	20.687	55.886	7.264			0.303046	0.66433
	18.652	19.706	30.148	72.231			0.39975	0.525887
	32.656	16.535	18.54	126.549			0.342039	0.552942
	20.312	21.471	53.767	27.924			0.410191	0.332101
	32.331	18.744	143.886	33.791			0.350964	0.632114
	37.155	23.324	70.079	66.201			0.178491	0.444472
	31.094	17.293	56.393	58.257			0.280577	0.412925
	23.324	22.613	57.094	60.514			0.583751	0.40816
	7.369	29.839	45.328	67.356			0.738523	0.48244
	15.813	19.806	119.871	70.258			0.443049	0.541209
	8.812	25.42	49.185	119.693			0.591072	0.610091
	13.64	14.705	42.634	115.007			0.367923	0.710378
	56.711	19.716	79.099	32.939			0.413318	0.51796
	25.34	33.939	71.071	44.754			0.461237	0.865458
	36.601	34.811	25.737	17.94			0.433398	0.473684
	38.063	12.264	78.211	45.897			0.400243	0.731087
	44.9	21.191	98.377	57.35			0.453765	0.301633
	36.613	30.389	52.959	14.118			0.32772	0.431138
	26.366	10.398	171.484	17.975			0.377242	0.326955
	34.145	7.897	138.823	99.856			0.421799	0.764766
	11.267	19.641	46.764	86.116			0.378028	0.522045
	19.85	15.947	70.126	31.006			0.436318	0.372392
	16.474	24.924	99.95	64.329			0.419258	0.394237
	26.077	25.627	7.775	31.017			0.573785	0.491108
	21.905	25.874	81.973	61.176			0.380094	0.56817
	23.948	28.834	62.183	51.541			0.457461	0.813116
	31.894	32.257	10.268	51.141			0.717666	0.628653
	18.004	21.278	42.015	76.814			0.230598	0.680688
	24.771	11.11	75.682	18.92			0.605929	0.513155
	30.299	30.793	36.185	83.131			0.758621	0.634626
	21.587	12.735	6.517	155.759			0.347353	0.582985
	13.922	24.443	49.133	24.13			0.353121	0.534436
	33.222	30.272	43.094	31.626			0.31252	1.10708
	46.764	27.498	68.521	81.089			0.601757	0.397049
	21.162	13.843	28.527	117.742			0.460637	0.516954
	25.998	38.142	144.235	55.01			0.30503	0.509575
	33.803	37.123	118.435	48.44			0.356296	0.479943
	28.522	26.667	7.466	27.942			0.642965	0.545698
	10.23	50.961	40.225	47.251			0.78876	0.374258
	19.272	25.474	75.939	29.215			0.367061	0.736659
	44.369	34.382	86.825	78.956			0.459051	0.528277
	24.648	18.726	76.732	62.676			0.308392	0.473529
	38.131	9.687	78.469	62.141			0.563475	0.488421
	7.75	36.246	77.469	93.866			0.626755	0.701393
	19.687	21.296	35.383	99.219			0.305559	0.433236
	30.405	24.814	81.222	58.968			0.315593	0.505233
	26.158	9.284	57.233	94.79			0.377818	0.371206
	14.996	11.321	56.831	122.598			0.739848	0.35843
	25.747	25.112	67.296	49.284			0.459045	0.375063
	27.541	25.721	36.765	69.379			0.441453	0.6273
	33.241	26.539	74.695	64.644			0.627608	0.355073
	43.067	22.94	83.749	26.23			0.352908	0.683778
	27.48	7.111	45.965	21.554			0.345028	0.423623
	39.293	21.529	105.009	89.995			0.310678	0.374366
	33.481	21.102	39.71	97.176			1.31576	0.566659
	36.093	21.554	21.826	29.493			0.268293	0.569127
	33.494	13.959	101.992	30.934			0.502281	0.491785
	16.456	22.058	59.327	14.996			0.530234	0.983412
	34.919	33.965	75.051	88.743			0.427174	0.587643
	47.963	13.421	103.862	65.366			0.573723	0.545501
	56.254	37.207	135.579	28.374			0.419476	0.658244
	22.253	3.609	60.988	81.554			0.490906	0.534468
	35.96	23.633	63.368	47.231			0.214946	0.483767
	29.417	60.472	12.496	55.551			0.481064	0.444657
	15.5	6.779	41.491	139.18			0.300274	0.618288
	27.155	33.722	69.127	52.638			0.34814	0.442167
	27.218	31.262	82.609	92.258			0.499962	0.608572
	38.211	22.797	93.013	49.104			0.372699	0.416487
	17.94	51.081	121.789	22.917			0.560496	0.487136
	44.129	32.881	46.728	20.956			0.28548	0.308809
	15.313	30.832	7.083	21.456			0.360391	0.948701
	28.046	3.726	35.079	53.918			0.412378	0.651735
	39.818	100.115	63.243	38.192			0.429633	0.639957
	30.715	33.864	70.376	114.299			0.383482	0.445335
	16.265	23.773	60.255	82.115			0.414723	0.618761
	21.101	16.147	56.73	42.727			0.575502	0.698608
	34.943	33.28	39.105	106.011			0.184283	0.494774
	12.95	0	77.357	120.928			0.489845	0.620184
	36.691	22.948	63.569	54.99			0.523253	0.688877
	26.619	30.588	39.458	190.162			0.501388	1.21267
	22.193	27.541	30.746	17.651			0.306417	0.452687
	25.76	131.645	59.649	28.658			0.497829	0.561414
	19.728	52.653	116.222	144.054			0.27524	0.554692
	23.347	21.137	25.179	44.839			0.545455	0.454079
	19.421	25.488	25.118	117.127			0.432484	0.333081
	59.069	8.376	69.072	120.657			0.677111	0.510087
	40.686	14.445	68.211	52.616			0.263347	1.06304
	35.981	46.085	16.88	35.095			0.38024	0.347206
	27.19	11.458	11.199	44.665			0.384159	0.550141
	13.459	31.404	28.293	60.143			0.35955	0.655945
	25.488	22.618	33.56	45.041			0.299876	0.715194
	19.342	23.258	43.811	43.213			0.426095	0.324597
	18.91	43.227	11.203	41.779			0.629217	0.559875
	29.273	28.61	53.88	44.938			0.289675	0.354159
	34.19	39.118	38.86	56.95			0.283628	0.368528
	20.309	24.342	34.505	64.405			0.337093	0.638538
	62.473	48.516	26.503	118.983			0.511766	0.609125
	23.872	26.457	106.889	80.833			0.678922	0.425768
	23.932	48.966	55.842	41.008			0.661059	0.479126
	37.062	24.993	43.117	106.446			0.561701	0.464471
	14.273	39.714	23.339	33.833			0.784957	0.545702
	24.443	42.68	18.353	38			0.578651	0.383119
	35.634	46.933	24.841	49.684			0.736052	0.325989
	25.849	34.454	9.248	53.568			0.364369	0.469165
	54.801	43.071	41.305	76.654			0.353578	0.451519
	26.886	29.853	36.355	80.96			0.56371	0.549185
	36.466	67.365	29.426	60.312			0.4891	0.573711
	34.386	11.749	11.314	85.149			0.483955	0.387977
	23.417	19.019	121.723	180.227			0.314801	0.50621
	33.232	35.492	30.641	124.847			0.421902	0.665966
	34.91	53.063	22.434	281.068			0.583891	0.629632
	26.439	63.562	73.878	92.055			0.425265	0.675617
	22.917	10.986	20.387	145.874			0.593669	0.354563
	40.686	19.459	17.277	71.082			0.526243	0.60273
	28.212	25.782	35.909	46.241			0.54009	0.456263
	43.32	34.721	54.902	19.1			0.419664	0.90184
	31.324	23.48	87.062	62.637			0.429231	0.5
	18.605	71.249	62.163	68.955			0.438593	0.564074
	36.786	47.414	46.068	108.716			0.414999	0.505981
	29.892	31.58	38.492	93.574			0.431031	0.565686
	31.98	95.214	58.978	61.184			0.457571	0.517088
	29.455	108.644	26.452	100.264			0.60182	1.21938
	29.339	115.411	61.891	105.11			0.414697	0.401765
	40.42	19.132	47.377	37.303			0.502925	0.363586
	32.926	67.0362	70.538	35.92			0.535556	0.463101
	32.948	25.112	111.326	44.754			0.795922	0.55
	32.253	30.364	32.469	42.375			0.485039	0.517542
	38.185	6.539	19.806	155.221			0.436065	0.806656
	14.036	19.001	52.963	60.862			0.461237	0.678194
	31.324	29.128	87.82	66.5			0.352418	1.26882
	35.174	16.242	40.684	29.775			0.550338	0.371878
	41.43	21.41	59.955	29.912			0.383999	0.578821
	39.506	30.439	89.919	31.28			0.396558	0.400715
	39.261	43.792	39.652	64.6			0.538362	0.456712
	34.637	25.149	27.48	59.303			0.406535	0.548359
	19.689	33.834	19.569	113.155			0.190124	0.360536
	11.487	25.123	62.99	69.322			0.542857	0.569405
	16.36	33.723	106.617	105.446			0.420564	0.367677
	19.019	25.188	27.915	16.803			0.290909	0.478786
	26.093	129.893	86.869	30.405			0.430931	0.552798
	37.897	55.065	28.217	141.134			1.05677	0.452685
	30.427	24.498	75.753	46.09			0.386941	0.354167
	19.122	56.784	38.412	54.789			0.59838	0.670203
	35.488	27.324	22.934	117.416			0.555451	0.422762
	40.319	8.68	54.258	112.282			0.431627	0.462906
	6.994	14.909	36.608	58.924			0.468605	0.645365
	10.458	33.834	49.945	113.155			0.419529	0.360536
	21.66	25.123	15.269	69.322			0.413781	0.569405
	25.916	33.723	52.719	105.446			0.473029	0.367677
	37.74	25.188	11.47	16.803			0.479759	0.478786
	17.227	129.893	45.49	30.405			0.416045	0.552798
	20.899	55.065	49.142	141.134			0.451358	0.452685
	35.63	24.498	66.662	46.09			0.512513	0.354167
	30.407	56.784	117.054	54.789			0.355362	0.670203
	44.149	27.324	73.45	117.416			0.440725	0.422762
	41.051	8.68	34.815	112.282			0.505268	0.462906
	15.037	14.909	55.74	58.924			0.668996	0.645365
	17.738	14.142	25.691	52.962			0.768278	0.414634
	22.496	20.842	7.903	35.362			0.907164	0.511407
	15.688	19.172	17.561	44.925			0.751048	0.341925
	18.356	9.997	45.667	50.981			0.810551	0.413765
	25.528	11.199	66.558	23.92			0.525832	0.667168
	25.512	35.569	94.904	18.403			0.45441	0.76112
	23.109	21.96	22.628	29.841			0.475643	0.625868
	10.885	20.21	35.732	25.732			0.7698	0.626979
	24.872	23.838	62.746	107.038			0.457816	0.284935
	33.974	29.069	48.039	49.26			0.393222	0.445304
	30.314	24.566	124.406	21.248			0.398731	0.340841
	37.848	31.25	153.822	23.269			0.455317	0.457023
	31.373	15.085	163.257	17.098			0.539329	0.461585
	24.539		135.72				0.514528
	23.458		75.91				0.293962
	45.591		84.902				0.554404
	23.087		80.574				0.420456
	28.551		77.668				0.635463
	18.141		100.497				0.526968
	8.944		79.575				0.62869
	16.335		32.739				0.512325
	33.538		78.586				0.472222
	26.651		57.739				0.433163
	28.965		64.76				0.519894
	23.806		30.598				0.388533
	27.47		68.822				0.676375
	27.533		89.864				0.628095
	23.733		83.192				0.368654
	29.102		42.356				0.228806
P9 brains, 48h post electroporation
Number of values	199	183	199	183			199	183
Minimum	6.994	0	6.517	6.269			0.1785	0.2849
25% Percentile	20.9	19.46	34.82	33.79			0.378	0.4311
Median	27.22	25.19	55.89	55.55			0.4441	0.5175
75% Percentile	34.91	33.97	78.21	90			0.5503	0.6287
Maximum	62.47	131.6	171.5	281.1			1.316	1.269
Mean	28.11	30.86	60.07	64.98			0.4743	0.549
Std. Deviation	10.13	22.58	34.64	40.62			0.1518	0.1793
Std. Error of Mean	0.7181	1.669	2.456	3.003			0.01076	0.01325

## Sheet: Fig5 S1-G
Figure 5 Supplement1-G	CGN measurments: P7 -> P20 and P30, GFP+ cell body shape and amount of dendrites
	Cell body diameter						cell body morphology						primary dendrites
	P20		P30				P20		P30				P20		P30
genotype	PlxnB2fl/fl	En1cre;Plxnb2fl/fl	PlxnB2fl/fl	En1cre;Plxnb2fl/fl		genotype	PlxnB2fl/fl	En1cre;Plxnb2fl/fl	PlxnB2fl/fl	En1cre;Plxnb2fl/fl		genotype	PlxnB2fl/fl	En1cre;Plxnb2fl/fl	PlxnB2fl/fl	En1cre;Plxnb2fl/fl
cell body diameter (um)	8.23	6.656	8.846	10.225		cell body width/length ratio	0.766586	1.04657	0.492965	0.689885		amount of primary dendrites per cell	5	4	3	3
	6.748	8.823	8.392	7.878			0.943539	0.660093	0.644535	0.625516			5	4	2	4
	7.075	7.504	8.982	9.321			0.850601	0.761727	0.805729	0.791265			6	4	3	3
	8.23	8.461	7.791	9.152			0.640219	0.776386	0.638209	0.711485			5	5	3	5
	8.915	7.849	10.177	12.13			0.533707	0.776022	0.487416	0.743953			5	5	3	4
	8.69	8.735	9.282	6.77			0.89275	0.620836	0.480886	0.745409			4	4	2	3
	7.526	7.568	8.496	7.91			0.836965	0.84342	0.672605	0.953429			6	5	4	4
	6.694	10.197	8.025	8.69			0.909023	0.605766	0.624294	0.853902			3	5	2	5
	8.308	7.716	7.672	12.855			0.761074	0.949196	0.825022	0.729075			5	3	3	2
	10.385	9.86	7.913	7.579			0.623303	0.496856	0.711435	0.607215			3	5	4	3
	8.204	10.146	8.496	8.758			0.650049	0.509659	0.760109	0.966754			6	5	4	3
	6.706	7.236	7.28	7.408			0.838354	0.858762	0.778192	0.792717			3	5	3	5
	7.162	7.78	9.124	7.454			0.945267	0.807969	0.681881	0.491075			4	5	3	4
	7.975	8.134	7.579	7.7			0.747461	0.747234	0.734505	0.59683			6	5	4	3
	8.184	8.433	8.812	8.443			0.698436	0.712439	0.687349	0.873008			4	4	6	5
	6.879	6.823	9.382	7.624			0.998692	0.728272	0.76145	0.647994			5	3	5	3
	7.94	9.114	7.408	7.075			0.594081	0.557713	0.661712	0.696823			4	4	5	4
	7.716	7.688	7.027	7.451			0.589813	0.764178	0.485977	0.767133			4	6	2	5
	8.392	8.197	11.238	8.049			0.934461	0.727217	0.718271	0.877583			5	4	3	5
	9.103	8.829	8.722	7.812			0.674283	0.792049	0.628087	0.400263			4	5	5	4
	10.828	8.722	7.68	6.823			0.374954	0.788695	0.761676	0.850467			3	5	3	3
	10.765	9.536	6.87	8.915			0.521505	0.562185	0.639372	0.849164			5	6	4	4
	7.747	6.568	7.039	6.898			0.828708	0.844245	0.457234	0.867984			4	5	5	3
	7.568	7.649	8.68	7.42			0.90777	0.941038	0.523541	0.828214			7	5	4	3
	7.856	8.829	8.039	8.633			0.852088	0.731227	0.627892	0.856303			5	4	4	3
	8.633	7.738	6.203	8.06			0.651222	0.669811	0.469717	0.741214			3	4	3	3
	9.428	7.198	9.867	7.44			0.492575	0.710892	0.656546	0.685779			4	4	3	3
	9.371	9.208	8.049	8.773			0.37488	0.485556	0.814991	0.643329			5	2	3	3
	8.481	7.579	7.691	7.21			0.55135	0.698377	0.798339	0.709191			3	5	6	3
	7.469	7.514	6.944	8.619			0.680546	0.832446	0.862913	0.858355			4	3	4	4
	8.105	10.377	7.78	7.582			0.782233	0.594102	0.775794	0.725648			5	3	5	4
	6.757	8.102	8.812	8.025			0.967145	0.49062	0.809746	0.821013			3	3	3	3
	6.165	9.649	8.682	8.908			0.905758	0.501814	0.694524	0.708687			4	5	4	3
	8.269	10.267	7.605	6.898			0.876164	0.478426	0.805318	0.867569			4	4	4	5
	6.898	7.33	8.121	7.054			0.903305	0.838336	0.851575	0.787299			5	4	4	6
	6.38	10.16	9.371	7.977			0.963166	0.47185	0.971231	0.96505			5	5	2	4
	8.049	9.173	9.82	8.415			0.634116	0.596533	0.760967	0.786984			4	2	5	2
	6.932	8.331	7.791	7.94			0.954559	0.74997	0.717791	0.71707			4	3	6	2
	7.307	8.889	8.947	7.799			0.742439	0.674204	0.469642	0.534839			5	6	2	3
	6.823	9.382	9.556	8.155			0.759637	0.732253	0.77506	0.647138			4	5	4	5
	7.658	7.313	6.732	8.564			0.576913	0.719404	0.899111	0.986602			4	5	5	3
	9.217	6.456	8.189	8.29			0.603776	0.995973	0.964744	0.889166			4	3	4	4
	7.126	6.87	7.339	8.176			0.783048	0.936972	0.864946	0.800027			4	4	6	4
	6.706	7.304	8.896	8.69			0.732478	0.87856	0.718822	0.634605			6	4	5	4
	7.523	7.87	7.691	8.702			0.777482	0.903558	0.836247	0.578366			6	4	3	3
	10.091	6.993	10.155	7.621			0.435438	0.920492	0.692365	0.877802			4	3	3	4
	6.309	9.818	7.799	6.286			0.747028	0.568751	0.849415	0.988332			4	3	3	2
	7.87	8.942	7.219	6.38			0.911563	0.589242	0.743055	0.70844			3	5	3	3
	7.769	7.921	7.856	8.877			0.65697	0.860624	0.771514	0.613232			4	4	3	3
	9.177	7.514	7.304	8.682			0.573281	0.679265	0.670377	0.924981			4	3	3	4
	8.877	9.705	8.504	6.134			0.664864	0.673776	0.490455	0.778311			5	4	5	5
	8.932	7.75	8.768	9.527			0.731527	0.721161	0.936515	0.576458			5	3	3	5
	7.44	7.369	7.722	5.503			0.750269	0.653006	0.781426	0.978264			4	3	4	4
	9.083	7.069	8.071	7.87			0.618298	0.808601	0.785048	0.872963			5	4	3	4
	7.152	7.466	7.33	7.304			0.766219	0.948701	0.59654	0.72124			5	3	4	4
	8.272	9.55	6.722	7.523			0.878264	0.585236	0.981248	0.809905			4	4	5	4
	7.652	6.576	8.514	7.649			0.583246	0.9007	0.753165	0.662039			4	4	5	3
	7.99	6.539	8.102	6.678			0.839299	0.996636	0.588168	0.875025			6	5	2	4
	8.735	7.069	7.582	8.69			0.610532	0.965766	0.776119	0.608871			3	5	2	3
	7.205	8.467	6.248	7.856			0.59195	0.699539	0.755666	0.882207			4	3	4	5
	7.669	8.686	7.78	6.165			0.777807	0.848377	0.662399	0.903041			3	3	3	5
	8.727	7.454	6.47	7.364			0.729117	0.999598	0.919581	0.866101			3	5	4	4
	8.659	7.126	7.307	7.111			0.651576	0.733651	0.61082	0.960715			5	4	4	3
	8.665	8.269	7.138	10.007			0.785805	0.715685	0.635311	0.972275			5	2	3	2
	7.132	6.456	8.041	6.202			0.84871	0.906599	0.872638	0.655643			5	4	3	3
	8.341	8.829	9.079	7.219			0.851217	0.59214	0.5934	0.770283			4	3	1	5
	9.207	8.771	6.882	7.633			0.752362	0.67518	0.976265	0.673475			4	4	4	4
	8.325	7.233	6.296	7.784			0.737778	0.600719	0.593688	0.614259			6	3	3	3
	8.113	7.891	7.454	7.559			0.646493	0.722469	0.618955	0.585389			4	7	4	4
	7.627	9.942	9.339	7.446			0.805953	0.559747	0.72732	0.680735			5	4	3	4
	7.656	9.065	10.146	9.071			0.990334	0.652841	0.732264	0.68603			4	4	4	4
	8.115	8.846	7.4	8.497			0.649661	0.644472	0.947697	0.745859			4	4	4	4
	7.48	8.277	8.392	8.491			0.861898	0.574846	0.976207	0.867243			5	5	1	4
	8.146	7.339	6.993	9.729			0.718021	0.755553	0.67314	0.752048			4	5	3	5
	7.349	8.758	7.359	9.942			0.803102	0.619434	0.914008	0.895976			4	3	6	3
	7.633	7.489	6.217	9.322			0.844622	0.76125	0.910127	0.825412			5	5	1	5
	6.961	7.523	7.514	8.748			0.740124	0.813505	0.866615	0.741904			4	4	4	3
	8.715	5.993	9.18	8.768			0.695697	1.00951	0.623384	0.795224			3	3	2	3
	6.906	7.219	7.23	8.649			0.813206	0.665882	0.767558	0.93903			4	4	4	6
	8.846	10.296	8.29	7.504			0.728804	0.35742	0.634562	0.807762			5	4	3	4
	7.752	7.913	7.647	8.18			0.90338	0.794389	0.791159	0.972638			4	5	3	4
	7.911	8.792	7.78	7.287			0.744786	0.620564	0.733855	0.836777			4	3	4	5
	8.538	9.114	8.228	8.987			0.563949	0.459184	0.565702	0.484362			4	5	4	3
	8.526	8.071	7.021	7.669			0.674642	0.540206	0.992892	0.604886			5	4	4	4
	8.613	6.642	6.932	9.03			0.66388	0.871725	0.563867	0.83886			4	3	4	3
	9.971	6.591	8.29	5.963			0.701434	0.696252	0.847166	0.811973			4	4	5	2
	8.47	6.286	7.313	9.939			0.712751	0.970888	0.596353	0.892706			8	4	3	3
	8.044	8.536	6.665	7.609			0.674167	0.852858	0.871503	0.752399			7	5	3	5
	8.134	6.391	7.647	6.822			0.647283	0.853701	0.98191	0.924145			6	4	4	3
	6.809	8.369	7.075	6.256			0.78925	0.89485	0.932091	0.793915			4	3	3	3
	8.376	7.111	8.954	7.943			0.688395	0.878639	0.809611	0.810651			5	4	3	6
	9.305	8.23	7.716	9.002			0.697689	0.814824	0.909604	0.836155			4	5	4	3
	8.866	7.307	8.473	9.03			0.678886	0.792391	0.888144	0.633242			5	4	4	3
	8.376	6.665	6.898	9.636			0.617598	0.775244	0.755205	0.700056			5	5	3	3
	9.098	7.44	7.219	7.482			0.586722	0.877151	0.825975	0.953637			5	3	2	3
	7.875	7.716	6.2	7.48			0.709714	0.682867	0.868957	0.755051			7	4	3	3
	7.152	7.039	8.049	8.672			0.776846	0.710754	0.773992	0.851343			4	4	4	3
	7.609	8.877	10.906	9.275			0.734788	0.640532	0.932873	0.67427			6	5	4	3
	7.456	7.856	10.234	8.272			0.791577	0.748218	0.683069	0.6403			6	5	3	4
	7.875	9.905	7.621	7.844			0.792254	0.608279	0.802672	0.979193			4	3	5	4
	8.793	9.217	8.308	9.038			0.606505	0.601606	0.856472	0.495294			4	4	4	4
	7.287	6.106	8.574	9.071			0.704817	0.974451	0.656259	0.640116			6	4	4	3
	10.199	6.41	9.337	7.849			0.735758	0.939938	0.924513	0.812551			4	5	3	5
	7.844	7.523	10.333	7.7			0.84026	0.686827	0.761958	0.783467			6	5	3	4
	7.633	6.665	8.476	7.14			0.963186	0.938485	0.728051	0.833072			3	4	3	4
	7.083	6.665	8.142	7.919			0.845263	0.901425	0.741608	0.636105			5	4	4	4
	8.873	7.621	7.921	9.517			0.830497	0.806325					3	4	4	4
	6.173	8.836	8.719	10.667			0.980561	0.665233					4	5	4	3
	7.627	7.579	8.433	9.939			0.900223	0.67344					5	3	4	4
	9.527	7.443	7.511	8.197			0.77674	0.939541					4	3	3	4
	8.771	7.408	7.23	9.282			0.824649	0.711258					4	5	3	5
	7.189	7.304	9.616	8.889			0.862846	0.782585					3	4	5	4
	7.039	7.621	8.719	8.06			0.968461	0.81984					5	3	5	2
	8.06	8.511	8.69	6.678			0.923449	0.674656					3	4	4	5
	9.641	7.669	9.687	9.124			0.716419	0.846134					2	5	3	4
	9.748	5.918	9.556	8.829			0.542983	0.977864					3	4	3	5
	7.897	8.142	8.675	9.896			0.858427	0.503807					3	4	5	4
	8.176	7.766	7.897	8.362			0.715876	0.82668					3	4	3	5
	9.543	7.543	7.28	7.579			0.606413	0.641389					4	4	4	4
	6.848	8.875	8.341	10.42			0.87573	0.652394					4	5	4	3
	9.337	7.747	9.096	9.527			0.564314	0.704273					3	4	3	2
	8.829	5.79	10.11	8.347			0.704157	0.992401					5	4	4	5
	10.385	9.733	7.823	10.568			0.528743	0.637316					4	3	4	4
	9.177	8.875	11.822	7.87			0.525771	0.649465					3	4	3	5
	7.304	6.078	7.18	8.726			0.951123	0.865581					4	3	4	3
	8.636	7.162	6.724	7.597			0.773275	0.734571					3	3	3	4
	8.041	8.521	7.225	10.633			0.741326	0.757658					6	3	4	4
	9.382	8.812	7.922	9.416			0.748028	0.660236					4	5	4	5
	7.039	9.098	7.395	8.254			0.72695	0.604309					5	4	4	4
	8.277	6.512	7.059	7.287			0.727921	0.844287					5	4	3	3
	8.433	7.967	7.287	8.237			0.496265	0.899335					6	4	4	2
	11.244	8.692	7.145	7.14			0.447172	0.623907					5	5	5	4
	8.69	8.356	7.903	8.536			0.570771	0.616563					4	5	4	4
	6.694	7.26	7.369	8.895			0.994174	0.889807					4	3	4	4
	9.182	9.229	8.48	9.541			0.770094	0.66887					5	3	5	5
	8.286	8.97	7.824	7.627			0.716993	0.718729					5	4	4	2
	7.519	7.672	8.581	7.78			0.851443	0.747784					5	4	3	3
	9.44	5.818	7.442	9.065			0.666737	0.613269					4	3	3	4
	8.727	7.747	7.652	9.023			0.714908	0.769975					5	3	5	5
	9.038	7.844	6.864	7.782			0.683005	0.769633					5	4	5	5
	8.878	9.925	7.708	7.385			0.60802	0.509924					4	5	4	3
	8.325	7.953	8.692	7.165			0.774895	0.768012					4	4	4	4
	10.325	8.97	7.609	7.897			0.675545	0.792977					4	3	4	4
	8.134	8.911	7.99	9.173			0.762233	0.569745					4	5	4	4
	8.895	9.46	7.265	8.313			0.77403	0.558034					5	4	5	4
	10.39	7.076	6.947	8.812			0.537247	0.899237					4	3	4	4
	10.604	10.241	8.692	8.142			0.59355	0.635875					4	5	4	5
	8.308	9.55	8.895	7.165			0.735195	0.606387					5	3	4	4
	8.038	9.887	10.319	7.624			0.791366	0.748761					5	5	4	3
	9.536	9.517	6.852	7.451			0.663276	0.669539					4	5	4	4
	7.383	9.178	7.979	8.889			0.935392	0.610046					5	5	3	5
	8.857	7.145	8.039	8.875			0.820255	0.950875					4	4	3	4
	8.285	10.198	7.919	7.897			0.79662	0.518729					4	5	4	5
	10.231	7.627	7.466	5.742			0.683218	0.796775					6	5	3	3
	9.334	8.027	6.794	7.014			0.634026	0.904447					5	5	3	4
	8.038	7.782	7.911	9.825			0.76412	0.940118					6	3	4	4
	9.586	9.22	8.643	6.665			0.556854	0.60141					4	4	5	3
	10.222	9.123	7.633	7.921			0.715711	0.636852					5	4	4	3
	8.393	9.15	8.279	8.521			0.735256	0.521858					6	5	4	4
	9.517	6.681	7.349	7.269			0.707156	0.858404					5	6	4	4
	8.574	8	9.15	7.486			0.784931	0.87075					5	3	4	4
	9.428	7.504	8.813	8.771			0.677874	0.803438					6	6	4	4
	7.165	9.63	7.145	8.359			0.919051	0.653583					5	4	3	5
	8.619	9.516	9.363	9.075			0.623158	0.654792					5	4	4	4
	9.76	8.39	7.331	9.922			0.810553	0.976996					4	8	4	4
	8.356	8.333	8.619	9.649			0.82001	0.884315					4	3	3	3
	7.747	8.737	8.768	7.649			0.823932	0.764336					5	3	3	3
	8.267	8.002	7.672	6.972			0.746704	0.836541					4	4	4	2
	9.071	8.325	6.921	7.304			0.581193	0.891532					3	6	3	5
	7.519	10.057	6.73	7.102			0.712063	0.448046					5	2	4	3
	8.341	8.771	7.145	7.394			0.873636	0.569034					6	3	4	4
	7.826	10.022	7.003	8.134			0.79747	0.558671					6	4	3	4
	6.966	9.449	5.768	6.286			0.776486	0.584083					4	5	3	4
		8.137	7.722	7.491				0.840973						5	4	4
		5.498	7.722	8.682				1.02146						5	5	4
		8.459	8.895	8.473				0.805651						5	3	3
		7.504	8.002	7.511				0.746135						5	4	4
		8.325	8.981	8.504				0.777778						1	5	3
		8.267	8.461	6.882				0.78142						6	3	4
		7.111	7.789	6.591				0.991984						4	4	4
		8.771	7.633	7.812				0.666857						4	4	4
		8.308	7.456	8.152				0.623857						5	3	4
		8.496	8.048	7.469				0.812971						5	4	4
		8.521	7.145	7.102				0.586081						5	4	4
		8.601	8.609	6.993				0.476921						4	4	4
		8.812	7.292	6.823				0.549478						4	4	3
		7.738	7.352	7.782				0.801628						5	5	4
		7.523	6.332	5.409				0.638974						5	5	4
		8.308	7.658	7.162				0.676697						4	4	5
		7.21	6.029	8.473				0.933703						5	3	3
		7.977	7.456	8.228				0.751285						5	4	5
		8.049	7.349	6.845				0.723444						5	5	2
		8.758	7.769	7.951				0.641927						3	4	4
		6.882	6.578	7.102				0.915286						4	4	4
		7.018	7.19	7.189				0.62126						4	4	4
		8.204	7.672	6.842				0.855802						3	4	4
		8.792	8.251	7.691				0.599295						4	5	5
		8.313	7.784	7.605				0.652592						4	3	4
		7.897	7.455	9.509				0.647968						4	4	4
		8.102	7.014	9.464				0.50506						4	4	5
		8.722	7.498	7.138				0.617863						4	3	3
		6.591	7.192	6.255				0.843726						3	4	4
		7.394	8.873	6.732				0.767514						5	4	2
		7.87	8.371	6.626				0.731512						5	3	3
		7.385		8.636				0.76845						4		3
		7.747		8.521				0.758745						5		4
		6.617		6.296				0.843282						4		3
		8.06		8.712				0.620223						4		5
		7.975		7.219				0.539185						6		3
		6.845		7.394				0.877721						4		4
		7.624		8.613				0.78607						5		5
		8.514		7.021				0.825699						3		3
		7.408		7.722				0.804671						3		4
		8.025						0.700561						3
		8.155						0.786879						5
		6.77						0.833826						5
		8.889						0.817752						3
		6.286						0.993955						3
		8.692						0.746549						4
		9.229						0.665836						5
		10.335						0.622835						4
		7.747						0.933652						3
		8.982						0.766199						4
		8.603						0.730675						5
		7.21						0.910957						5
		7.069						0.778469						5
		8.792						0.484076						4
		8.633						0.592726						3
		7.605						0.734254						3
		7.953						0.709795						4
		8.039						0.725712						3
		8.877						0.700349						5
		8.049						0.847683						4
		10.078						0.623735						2
		7.523						0.826399						5
		8.481						0.811461						3
		9.755						0.78124						6
		6.568						0.756547						3
		9.976						0.492382						4
		7.33						0.823465						5
		9.023						0.838745						5
		7.621						0.851463						4
		9.905						0.579707						3
		9.337						0.713827						5
		10.261						0.460189						6
		7.385						0.96371						4
		9.649						0.603171						4
		8.049						0.662567						4
		9.942						0.790183						3
		7.766						0.909477						4
		8.623						0.746492						4
		7.621						1						4
		8.039						0.749471						3
		9.282						0.685951						4
		9.027						0.723939						3
		8.025						0.950031						5
		8.483						0.639514						4
		8.773						0.743873						6
		8.636						0.592057						4
		7.669						0.929195						3
		8.925						0.710364						3
		8.768						0.823335						4
		9.065						0.348042						5
		8.915						0.724173						5
		7.523						0.88595						4
		9.114						0.64176						4
		8.633						0.804355						3
		9.509						0.698496						5
		9.3						0.707312						4
		9.466						0.712867						3
		9.527						0.574368						5
		8.102						0.830536						3
		8.966						0.682579						3
		9.792						0.681985						4
		8.144						0.72139						3
		11.048						0.471035						4
		7.42						0.687871						4
		8.362						0.741808						3
		7.975						0.811285						5
		9.589						0.699343						3
		9.954						0.685453						3
		8.773						0.670466						5
		8.925						0.737031						3
		8.915						0.62636						4
		7.523						0.582746						3
		10.493						0.599066						5
		7.491						0.811374						3
		8.944						0.754472						3
		8.084						0.951014						4
		8.719						0.650877						6
		7.523						0.953343						5
		8.413						0.813622						3
		9.3						0.66						3
		8.496						0.705862						5
		9.371						0.538363						4
		8.359						0.86362						4
		10.044						0.49552						4
		9.428						0.650615						4
		7.977						0.91814						5
		7.523						0.774026						5
		8.942						0.744241						4
		7.511						0.863933						5
		8.071						0.696568						3
		9.86						0.618966						3
		7.307						0.937184						4
		7.111						0.926874						4
		7.466						0.806992						3
		9.325						0.63807						3
		8.321						0.919						4
		8.925						0.735574						4
		7.769						0.885957						3
Number of values	173	311	204	213		Number of values	173	311	106	106		Number of values	173	311	204	213
Minimum	6.165	5.498	5.768	5.409		Minimum	0.3749	0.348	0.4572	0.4003		Minimum	2	1	1	2
25% Percentile	7.525	7.511	7.295	7.334		25% Percentile	0.6514	0.6395	0.6432	0.6741		25% Percentile	4	3	3	3
Median	8.23	8.155	7.79	7.91		Median	0.7401	0.7343	0.7579	0.7852		Median	4	4	4	4
75% Percentile	8.878	8.925	8.637	8.763		75% Percentile	0.8296	0.8387	0.85	0.8673		75% Percentile	5	5	4	4
Maximum	11.24	11.05	11.82	12.86		Maximum	0.9987	1.047	0.9929	0.9883		Maximum	8	8	6	6
Range	5.079	5.55	6.054	7.446		Range	0.6238	0.6985	0.5357	0.5881		Range	6	7	5	4
Mean	8.273	8.238	7.988	8.07		Mean	0.7385	0.7373	0.7456	0.7685		Mean	4.486	4.09	3.716	3.779
Std. Deviation	1.026	1.045	1.005	1.112		Std. Deviation	0.1285	0.1369	0.1353	0.1283		Std. Deviation	0.986	0.9393	0.903	0.865
Std. Error of Mean	0.078	0.05926	0.07033	0.07621		Std. Error of Mean	0.009771	0.007763	0.01314	0.01246		Std. Error of Mean	0.07496	0.05326	0.06322	0.05927
