# Supplementary material for: Plexin-B2 controls the timing of differentiation and the motility of cerebellar granule neurons
Source: eLife. 2021 Jun 8;10:e60554. doi: 10.7554/eLife.60554 (PMC8211449; doi:10.7554/eLife.60554)
Supplement: Figure 5—source data 1. [file elife-60554-fig5-data1.xlsx]

## Sheet: Fig 5D
Fig 5D	CGN measurments: GFP+ process length P7 -> P8
	Leading process		trailing process		unipolar process
genotype	PlxnB2fl/fl	En1cre;Plxnb2fl/fl	PlxnB2fl/fl	En1cre;Plxnb2fl/fl	PlxnB2fl/fl	En1cre;Plxnb2fl/fl
process length (um)	102.682	100.922	13.945	40.487	19.945	70.289
	138.014	29.461	42.276	24.848	18.346	37.21
	49.906	14.451	9.543	11.373	25.541	11.508
	58.949	38.692	52.32	28.52	63.062	41.593
	76.056	31	56.309	25.118	56.034	44.142
	68.189	13.02	29.355	7.806	99.897	38.385
	78.272	11.314	37.946	6.848	99.978	21.522
	70.742	51.536	37.357	28.285	45.483	20.15
	72.381	33.025	52.751	6.383	149.43	25.369
	118.086	24.464	30.285	8.735	20.575	8.947
	47.654	49.063	36.843	7.775	11.225	47.885
	41.99	86.267	32.904	10.177	45.112	18.124
	50.934	56.737	19.78	9.954	54.016	41.01
	107.291	35.863	18.94	22.958	30.337	61.245
	76.621	34.135	26.35	15.316	35.877	39.648
	41.647	24.361	17.061	9.905	68.51	19.041
	71.878	68.87	18.353	9.357		14.25
	76.718	54.36	61.6	45.375		38.704
	111.022	79.401	52.963	12.275		72.23
	61.07	18.726	31.784	15.313		46.893
	78.773	31.31	48.341	29.792		33.183
	92.96	130.373	9.614	54.144		63.277
	83.334	34.599	36.852	22.942		18
	91.426	81.812	59.866	50.602		46.166
	90.012	39.821	12.76	12.213		49.624
	71.317	71.023	4.547	35.052		63.034
	51.197	20.549	15.692	13.316		85.817
	80.454	55.168	16.374	19.031		15.344
	26.23	25.667	5.083	10.434		77.363
	61.235	57.523	15.037	44.372		36.246
	118.092	34.713	32.773	23.856		16.514
	100.612	37.876	91.023	14.055		51.559
	39.801	62.155	26.195	25.237		53.661
	41.499	37.571	13.534	6.823		59.486
	61.133	32.204	29.556	17.893		55.029
	37.378	22.013	33.378	15.506		46.617
	43.13	83.075	14.88	31.043		23.274
	50.121	54.42	39.56	43.652		29.669
	113.871	55.623	37.97	27.915		34.2
	55.275	87.459	19.726	70.502		39.93
	35.413	104.689	15.391	9.716		89.007
	55.027	45.065	30.457	5.701		69.606
	60.529	61.692	38.151	31.772		55.034
	58.78	50.437	42.939	40.651		13.853
		55.243		15.925		23.112
		99.469		32.865		59.022
		58.984		13.514		43.612
		21.334		10.084		52.407
		31.362		13.144		102.898
		39.428		9.922		76.177
		16.6		12.571		47.643
		40.164		5.584		47.68
		39.676		6.138		96.97
		58.5		45.041		31.262
		64.261		13.033		54.549
		39.571		12.486
		19.388		16.107
		48.37		5.834
		37.491		32.137
		74.962		12.946
		76.7		23.71
		95.641		38.261
		87.068		21.189
		76.527		27.845
		67.378		65.457
		49.345		10.155
		61.692		15.117
		58.853		16.638
		83.676		47.532
		59.916		58.344
		58.311		16.641
		65.607		52.228
		46.723		31.414
P8 tissue, 24h post electroporation, 2h post EdU injection
Number of values	44	73	44	73	16	55
Minimum	26.23	11.31	4.547	5.584	11.23	8.947
25% Percentile	50.32	33.58	15.86	10.31	21.82	25.37
Median	69.47	50.44	30.37	16.64	45.3	44.14
75% Percentile	88.34	66.49	39.21	31.59	67.15	59.02
Maximum	138	130.4	91.02	70.5	149.4	102.9
Mean	70.86	52.12	31.1	23.08	52.71	45.07
Std. Deviation	26.16	24.94	17.76	15.68	37.26	22.42
Std. Error of Mean	3.943	2.919	2.677	1.835	9.315	3.024

## Sheet: Fig 5E
Fig 5E	Colocalization analysis GFP+ CGN with EdU
	precursor		bipolar cell
genotype	PlxnB2fl/fl	En1cre;Plxnb2fl/fl	PlxnB2fl/fl	En1cre;Plxnb2fl/fl
% of GFP+ cells that is also EdU+, averaged per brain	49.1071	33.3333	5.51181	35
	44.6809	21.2766	8.82353	13.3333
	58.3333	62.5	8.96552	32.2222
	48.5714	54.7771	6.06061	29.5732
	62.7451		9.52381
	60		2.04082
P8 tissue, 24h post electroporation, 2h post EdU injection
Number of values	6	4	6	4
Minimum	44.68	21.28	2.041	13.33
25% Percentile	47.6	24.29	4.644	17.39
Median	53.72	44.06	7.442	30.9
75% Percentile	60.69	60.57	9.105	34.31
Maximum	62.75	62.5	9.524	35
Mean	53.91	42.97	6.821	27.53
Std. Deviation	7.368	19.01	2.866	9.722
Std. Error of Mean	3.008	9.506	1.17	4.861

## Sheet: Fig 5G
Fig 5E	Morphology of CGNs
	radial		tangential		precursor
genotype	PlxnB2fl/fl	En1cre;Plxnb2fl/fl	PlxnB2fl/fl	En1cre;Plxnb2fl/fl	PlxnB2fl/fl	En1cre;Plxnb2fl/fl
% of GFP+ cells in morphological stage, averaged per brain	57.7236	40	32.5203	41.1765	9.7561	18.8235
	49.0566	33.8028	35.8491	51.4085	15.0943	14.7887
	53.5135	46.6667	31.8919	43.3333	14.5946	10
	48.5714	36.6667	31.4286	53.3333	20	10
	41.1215	34.2857	38.3178	50	20.5607	15.7143
P9 tissue, 48h post electroporation, 2h post EdU injection
Number of values	5	5	5	5	5	5
Minimum	41.12	33.8	31.43	41.18	9.756	10
25% Percentile	44.85	34.04	31.66	42.25	12.18	10
Median	49.06	36.67	32.52	50	15.09	14.79
75% Percentile	55.62	43.33	37.08	52.37	20.28	17.27
Maximum	57.72	46.67	38.32	53.33	20.56	18.82
Mean	50	38.28	34	47.85	16	13.87
Std. Deviation	6.2	5.289	2.971	5.298	4.432	3.832
Std. Error of Mean	2.773	2.365	1.329	2.369	1.982	1.714
