# Supplementary material for: Plexin-B2 controls the timing of differentiation and the motility of cerebellar granule neurons
Source: eLife. 2021 Jun 8;10:e60554. doi: 10.7554/eLife.60554 (PMC8211449; doi:10.7554/eLife.60554)
Supplement: Figure 6—figure supplement 1—source data 1. [file elife-60554-fig6-figsupp1-data1.xlsx]

## Sheet: Fig6 S1-A
	Figure 6 Supplement 1-A	Vglut-1 synapses between parallel fibers and Purkinje cells
		Vglut-1+ synapse distribution
	genotype	PlxnB2fl/fl	En1cre;Plxnb2fl/fl
	Vglut1 integrated density in ML distal/proximal ratio, averaged per brain	0.289941	0.751749
		0.243748	0.767847
		0.179442	0.481017
		0.144435	0.575221
	P9 brains
	Number of values	4	4
	Minimum	0.1444	0.481
	25% Percentile	0.1532	0.5046
	Median	0.2116	0.6635
	75% Percentile	0.2784	0.7638
	Maximum	0.2899	0.7678
	Range	0.1455	0.2868
	Mean	0.2144	0.644
	Std. Deviation	0.06503	0.1393
	Std. Error of Mean	0.03251	0.06967
