# Supplementary material for: Plexin-B2 controls the timing of differentiation and the motility of cerebellar granule neurons
Source: eLife. 2021 Jun 8;10:e60554. doi: 10.7554/eLife.60554 (PMC8211449; doi:10.7554/eLife.60554)
Supplement: Figure 6—source data 1. [file elife-60554-fig6-data1.xlsx]

## Sheet: Fig 6A
Fig 6A	Parallel fiber distribution in EGL
	GFP, electroporated P7		TdTom, electroporated P11
genotype	PlxnB2fl/fl	En1cre;Plxnb2fl/fl	PlxnB2fl/fl	En1cre;Plxnb2fl/fl
Distribution of parallel fibers in EGL (% fiber width of total EGL width) averaged per brain	36.4511	82.8707	24.7944	71.6739
	30.7141	76.5009	39.1494	61.2063
	29.8736	72.9729	27.1138	68.3377
	23.278	93.595	24.4183	73.7325
	28.2191		31.0928
	37.4847		21.1615
	37.7084		24.4337
Brains isolated at P25
Number of values	7	4	7	4
Minimum	23.28	72.97	21.16	61.21
25% Percentile	28.22	73.85	24.42	62.99
Median	30.71	79.69	24.79	70.01
75% Percentile	37.48	90.91	31.09	73.22
Maximum	37.71	93.59	39.15	73.73
Mean	31.96	81.48	27.45	68.74
Std. Deviation	5.462	9.053	5.988	5.491
Std. Error of Mean	2.065	4.526	2.263	2.745
