# Supplementary material for: Plexin-B2 controls the timing of differentiation and the motility of cerebellar granule neurons
Source: eLife. 2021 Jun 8;10:e60554. doi: 10.7554/eLife.60554 (PMC8211449; doi:10.7554/eLife.60554)
Supplement: Figure 7—figure supplement 1—source data 1. [file elife-60554-fig7-figsupp1-data1.xlsx]

## Sheet: Fig7 S1-A
Figure 7 Supplement1-A	Pax6 staining in EGL explants at DIV2
	Pax 6 colocalization with DAPI
genotype	PlxnB2fl/fl	En1cre;Plxnb2fl/fl
% of DAPI that is also Pax6+, averaged per explant	99.2537	98.5816
	98.6111	95.5556
	100	99.2593
	99.1803	100
	98.6486	99.2701
	99.187	100
	99.0196	100
	97.0297	98.0892
	97.7273	100
	99.4048	96.3303
	100	98.8235
	97.2414	97.7876
Number of values	12	12
Minimum	97.03	95.56
25% Percentile	97.95	97.86
Median	99.1	99.04
75% Percentile	99.37	100
Maximum	100	100
Range	2.97	4.444
Mean	98.78	98.64
Std. Deviation	0.9798	1.48
Std. Error of Mean	0.2828	0.4272
