# Supplementary material for: Plexin-B2 controls the timing of differentiation and the motility of cerebellar granule neurons
Source: eLife. 2021 Jun 8;10:e60554. doi: 10.7554/eLife.60554 (PMC8211449; doi:10.7554/eLife.60554)
Supplement: Figure 7—figure supplement 2—source data 1. [file elife-60554-fig7-figsupp2-data1.xlsx]

## Sheet: Fig7 S2-A
Figure 7 Supplement2-A	Pax6 staining in DIV1 EGL explants from GFP-electroporated brains
	Pax6 colocalization with GFP
genotype	PlxnB2fl/fl	En1cre;Plxnb2fl/fl
% of GFP+ CGNs that is also Pax6+, averaged per explant	96.5517	100
	100	98.8889
	100	99.2537
	98.7654	100
	94.8718	95
	100	100
	100	96.7742
	100	98.9796
Number of values	8	8
Minimum	94.87	95
25% Percentile	97.11	97.3
Median	100	99.12
75% Percentile	100	100
Maximum	100	100
Range	5.128	5
Mean	98.77	98.61
Std. Deviation	1.989	1.806
Std. Error of Mean	0.7031	0.6385
