# Supplementary material for: Plexin-B2 controls the timing of differentiation and the motility of cerebellar granule neurons
Source: eLife. 2021 Jun 8;10:e60554. doi: 10.7554/eLife.60554 (PMC8211449; doi:10.7554/eLife.60554)
Supplement: Figure 7—source data 1. [file elife-60554-fig7-data1.xlsx]

## Sheet: Fig 7C
Fig 7C	Sholl analysis of cell migration around explant at DIV1
	DAPI cells						EDU+ cells
	PlxnB2fl/fl			En1cre;Plxnb2fl/fl			PlxnB2fl/fl			En1cre;Plxnb2fl/fl
sholl circle (um from explant)	mean crossings	sd	n	mean crossings	sd	n	mean crossings	sd	n	mean crossings	sd	n
1	1.84615	1.06819	13	1.82353	0.882843	17	1.20833	0.508977	24	1.29167	0.858673	24
2	2.05882	1.43486	17	1.78947	1.47494	19	1.28571	0.89679	28	1.25	1.29458	28
3	2.1	1.55259	20	2.15385	1.78196	26	1.40625	1.31638	32	1.5	1.50287	30
4	2.34783	1.30065	23	2.85714	1.9382	28	1.93939	1.81899	33	1.8	1.37465	30
5	3.2	2.21736	25	3.6	2.74929	30	2.35294	2.13033	34	2.5625	2.16925	32
6	3.54839	2.74273	31	4.41935	2.96394	31	2.65714	2.15492	35	2.9375	2.19879	32
7	4.38235	3.49904	34	6.25	4.18908	32	2.51429	2.18782	35	3.03125	2.52068	32
8	5.6	4.88214	35	6.28125	4.21391	32	2.31429	2.05471	35	2.46875	2.24304	32
9	6.97222	4.71766	36	6.72727	4.28859	33	2.54286	2.22741	35	2.71875	1.98761	32
10	7.55556	5.20683	36	8.23529	5.02152	34	2.51429	2.21454	35	3.375	2.40631	32
11	8.97222	5.97847	36	9.23529	5.88814	34	2.97143	2.68422	35	3.81818	3.56594	33
12	9.94444	6.81152	36	9.82353	6.19614	34	2.94286	2.75406	35	3.45455	2.63499	33
13	10.5833	6.67779	36	10.1176	6.65043	34	3.36111	2.70611	36	3.54545	2.53834	33
14	11.1944	6.30111	36	11.3529	6.97129	34	3.61111	3.10095	36	3.66667	3.17871	33
15	11.9722	5.6694	36	13.3824	7.88176	34	3.66667	3.80976	36	4	3.45507	33
16	13.5833	6.14294	36	13.5294	7.52062	34	3.27778	3.04829	36	3.78788	2.80354	33
17	14.75	6.58733	36	14.7059	8.51569	34	2.94444	2.08319	36	3.47059	2.52545	34
18	16.6111	8.29898	36	14.4412	7.19929	34	3.66667	2.90812	36	3.35294	1.95219	34
19	15.5278	7.43922	36	14.2647	6.50086	34	3.52778	3.19362	36	3.41176	2.60672	34
20	17.1111	7.70075	36	14.9118	8.14776	34	3.27778	2.79398	36	3.97059	3.21441	34
21	18.4722	9.66433	36	16.3529	9.19118	34	3.80556	3.68642	36	4.23529	3.66853	34
22	19.1111	9.43482	36	17.2647	8.5149	34	3.65714	3.65371	35	3.70588	3.08986	34
23	19.6667	10.3095	36	15.7647	7.79689	34	3.6	3.16414	35	3.20588	3.05286	34
24	20.3333	9.30745	36	16.5882	8.68687	34	3.45714	2.82159	35	3.44118	2.63072	34
25	20.25	8.48991	36	16.6176	8.86264	34	3.37143	2.55626	35	3.14706	2.23108	34
26	21.4722	9.77895	36	16.1765	7.30077	34	3.38235	2.69696	34	3.05882	2.43636	34
27	22.3889	10.1116	36	17.4706	7.73122	34	3.35294	2.79483	34	3.42424	2.81769	33
28	22.6944	9.29461	36	17.4118	7.86676	34	3.47059	2.86288	34	3.69697	2.77809	33
29	23.4722	8.99996	36	17.3529	7.55939	34	3.42424	2.66962	33	2.9697	2.25672	33
30	23.8333	9.61398	36	16.8529	7.59239	34	3.51515	3.27033	33	2.81818	2.20021	33
31	23.8889	10.5093	36	17	9.93921	34	2.87879	2.7586	33	2.78788	2.38167	33
32	24.1944	9.82073	36	15.9412	8.68974	34	2.84848	2.34682	33	2.6129	2.06038	31
33	24.1389	10.1084	36	15.5588	8.95846	34	3.42424	2.72753	33	2.51613	2.14275	31
34	24.7778	10.4884	36	16.5	9.29076	34	3.48485	2.84079	33	2.41935	2.36325	31
35	25.3889	10.8187	36	15.3824	8.75946	34	2.90909	2.76545	33	2.25806	2.38002	31
36	25.3889	11.7796	36	14.6765	8.95687	34	3.54545	3.31748	33	2.16129	2.43717	31
37	23.8889	11.8606	36	14.9706	9.35005	34	3.78788	3.56859	33	2.33333	2.59088	30
38	23.7222	11.5006	36	15.3235	10.8201	34	3.81818	3.28305	33	2.63333	2.70992	30
39	23.9722	11.0337	36	14.1471	9.26424	34	3.59375	2.7808	32	2.76667	2.7753	30
40	23.7222	11.4633	36	13.3529	9.31887	34	3.46875	3.27241	32	2.1	2.18695	30
41	25.6667	12.1208	36	12.1765	8.52259	34	2.75	2.286	32	2.23333	2.35889	30
42	24.6944	12.2587	36	12.4118	9.38767	34	2.625	2.51126	32	2.37931	2.78278	29
43	23.25	12.6545	36	12.8529	8.51427	34	2.4375	2.67531	32	2.17241	2.25308	29
44	24.4167	13.1157	36	12.4118	7.90135	34	2.34375	2.40442	32	2	2.26078	28
45	24.5833	14.0578	36	11.9412	9.04849	34	2.16129	2.89939	31	1.67857	1.86694	28
46	24.6667	13.2406	36	12.0294	8.6532	34	2.19355	2.66357	31	1.55556	2.17208	27
47	23.3611	14.8846	36	11.4412	8.74622	34	2.35484	2.88153	31	1.18519	1.41522	27
48	24.5833	14.2375	36	10.8824	7.67824	34	2.45161	2.4199	31	1.44444	1.82574	27
49	22.6389	13.5692	36	11.3235	8.40173	34	2.12903	1.962	31	1.92593	2.55593	27
50	21.4444	12.4015	36	11.3235	7.97238	34	2	1.8619	31	1.14815	1.48593	27
51	20.5278	12.7492	36	9.41176	6.8628	34	2.22581	2.2907	31	1.34615	1.83177	26
52	19.4444	12.8206	36	9.14706	7.17374	34	2.48276	2.32411	29	1.69231	2.64982	26
53	20.6667	13.7071	36	9.32353	7.77611	34	2.17241	1.9833	29	1.83333	2.51373	24
54	21.0833	13.6012	36	9.88235	8.31124	34	1.64286	1.78915	28	1.75	2.13154	24
55	20.3889	13.4723	36	8.79412	7.15956	34	1.82143	1.51666	28	1.75	2.382	24
56	19.4444	13.1745	36	9.5	7.19954	34	1.75	1.6015	28	1.65217	2.32787	23
57	19.25	13.0895	36	8.58824	7.60828	34	1.57143	1.81411	28	1.43478	2.2528	23
58	19.25	13.2996	36	8.73529	6.81046	34	1.44444	1.64862	27	1.30435	2.16238	23
59	18.5278	13.4025	36	8.5	6.9074	34	1.53846	1.90223	26	1.3913	1.94794	23
60	18.8056	14.1599	36	8.05882	7.20665	34	1.69231	2.11224	26	1.30435	2.22455	23
61	16.3056	13.1014	36	7.88235	7.47426	34	1.84615	2.75234	26	1.09091	1.82337	22
62	16.5	12.6322	36	7.58824	6.97232	34	1.56	2.00167	25	1.18182	1.50036	22
63	15.4444	12.1266	36	7.14706	6.26744	34	1.2	1.52753	25	1.14286	1.68184	21
64	14.6667	11.4043	36	6.94118	6.58254	34	1.4	1.89297	25	1.05	1.35627	20
65	13.0556	11.0271	36	6.02941	6.74867	34	0.958333	1.26763	24	0.95	1.79106	20
66	12.1944	10.4302	36	5.97059	5.33987	34	0.916667	1.05981	24	1.2	1.73509	20
67	13.0833	10.9293	36	6.14706	5.7479	34	1.33333	1.60615	24	0.6	0.753937	20
68	13.3611	10.8553	36	5.73529	5.6155	34	1.18182	1.50036	22	0.3	0.470162	20
69	12.9444	10.9282	36	5.55882	4.94939	34	1.27273	1.63829	22	0.55	0.887041	20
70	12.3056	9.84688	36	5.11765	4.98339	34	1.27273	1.63829	22	0.842105	1.30227	19
71	11.6389	10.1338	36	4.35294	4.5851	34	1.22727	1.50971	22	0.647059	1.05719	17
72	10.3333	9.64513	36	4.23529	4.35583	34	1	1.23443	22	0.647059	0.931476	17
73	10.4722	9.52136	36	4.02941	3.77781	34	0.454545	0.857864	22	0.6875	0.946485	16
74	10.3056	8.93091	36	4	4.28528	34	0.952381	1.74574	21	0.5	0.894427	16
75	9.91667	8.71247	36	3.70588	3.70527	34	1.14286	2.22004	21	0.4	0.632456	15
76	9.27778	8.69683	36	3.44118	3.21164	34	0.904762	1.64027	21	0.466667	0.63994	15
77	8.91667	8.67961	36	3.85294	3.42126	34	0.857143	1.71131	21	0.428571	0.646206	14
78	8.72222	8.51087	36	3.11765	3.34632	34	0.65	1.1821	20	0.416667	0.668558	12
79	8.22222	8.78671	36	2.58824	3.12485	34	0.8	1.15166	20	0.166667	0.389249	12
80	6.91667	7.53421	36	2.94118	3.06437	34	0.7	1.08094	20	0.166667	0.389249	12
81	6.66667	7.24667	36	2.55882	2.45185	34	0.7	1.34164	20	0.25	0.452267	12
82	5.75	6.10562	36	2.5	2.27303	34	0.333333	0.685994	18	0.166667	0.389249	12
83	5.86111	5.64246	36	2.58824	2.42609	34	0.388889	0.849837	18	0.25	0.621582	12
84	6.30556	6.50195	36	2.5	2.85243	34	0.5	0.707107	18	0.0833333	0.288675	12
85	6.27778	6.3228	36	2.64706	2.86972	34	0.294118	0.587868	17	0.0833333	0.288675	12
86	5.41667	5.33653	36	2.61765	2.53478	34	0.235294	0.437237	17	0.25	0.452267	12
87	5.16667	5.47983	36	2.20588	1.91927	34	0.375	0.806226	16	0.1	0.316228	10
88	5.77778	7.47992	36	1.85294	2.27146	34	0.6875	0.946485	16	0	0	10
89	4.94444	6.53319	36	1.88235	1.75404	34	0.5625	0.727438	16	0.1	0.316228	10
90	4.63889	4.64237	36	1.91176	1.97511	34	0.266667	0.593617	15	0.3	0.483046	10
91	4.16667	4.61983	36	1.79412	1.91927	34	0.133333	0.351866	15	0.2	0.421637	10
92	3.72222	4.1994	36	1.82353	2.19463	34	0	0	15	0.1	0.316228	10
93	4.25	4.64988	36	1.47059	1.69196	34	0.2	0.774597	15	0	0	9
94	3.63889	3.28766	36	1.38235	1.61461	34	0.266667	0.798809	15	0.222222	0.440959	9
95	3.58333	3.90878	36	1.35294	1.79025	34	0.4	0.736788	15	0.444444	0.726483	9
96	3.27778	4.55826	36	1.67647	1.75328	34	0.266667	0.593617	15	0.25	0.46291	8
97	3.16667	3.52542	36	1.23529	1.37199	34	0.266667	0.593617	15	0.125	0.353553	8
98	3.11111	3.76281	36	1.29412	1.60547	34	0.2	0.414039	15	0	0	7
99	2.80556	4.49011	36	1.64706	1.57408	34	0.333333	0.899735	15	0	0	7
100	2.97222	3.30788	36	1.41176	1.37329	34	0.333333	0.617213	15	0.142857	0.377964	7
101	2.83333	3.34237	36	1.52941	1.86247	34	0.333333	0.48795	15	0	0	7
102	2.55556	2.92227	36	1.41176	1.43796	34	0.2	0.414039	15	0.428571	0.786796	7
103	2.61111	3.66667	36	1.38235	1.43579	34	0.214286	0.578934	14	0.285714	0.48795	7
104	2.61111	3.86396	36	1.05882	1.01328	34	0.428571	0.937614	14	0	0	6
105	2.66667	3.94968	36	1.05882	1.39134	34	0.428571	0.851631	14	0	0	6
106	2.55556	3.38437	36	0.735294	1.21378	34	0.230769	0.438529	13	0	0	6
107	2.4	2.91245	35	1.26471	1.62012	34	0	0	12	0.166667	0.408248	6
108	2.54286	3.04228	35	0.970588	1.2428	34	0	0	12	0.166667	0.408248	6
109	2.22857	2.50981	35	1.26471	1.52373	34	0	0	12	0.166667	0.408248	6
110	1.82857	2.00713	35	0.911765	1.11104	34	0.166667	0.389249	12	0.166667	0.408248	6
111	1.57143	2.06206	35	0.882353	1.36548	34	0.0833333	0.288675	12	0.166667	0.408248	6
112	2.02857	2.57232	35	1	1.51757	34	0.0833333	0.288675	12	0	0	6
113	1.62857	1.62853	35	1.14706	1.41705	34	0.0909091	0.301511	11	0.166667	0.408248	6
114	1.68571	1.77849	35	0.941176	1.36939	34	0.181818	0.40452	11	0.166667	0.408248	6
115	1.45714	2.06288	35	0.911765	1.08342	34	0.181818	0.40452	11	0	0	6
116	1.25714	1.63316	35	0.941176	1.45521	34	0.2	0.632456	10	0.166667	0.408248	6
117	1.45714	1.915	35	0.794118	0.946426	34	0.2	0.632456	10	0.166667	0.408248	6
118	1.25714	1.48211	35	0.764706	0.98654	34	0	0	9	0.166667	0.408248	6
119	1.28571	1.48664	35	0.794118	1.24996	34	0.111111	0.333333	9	0.166667	0.408248	6
120	1.4	2.01757	35	0.647059	1.06976	34	0.222222	0.440959	9	0	0	6
121	1.4	2.2387	35	0.588235	0.820851	34	0.111111	0.333333	9	0	0	6
122	1.34286	1.84619	35	0.5	0.78817	34	0.111111	0.333333	9	0.166667	0.408248	6
123	1.22857	1.84846	35	0.852941	1.20937	34	0.111111	0.333333	9	0.333333	0.516398	6
124	1.02941	1.42457	34	0.588235	0.820851	34	0.222222	0.440959	9	0.166667	0.408248	6
125	1.05882	1.49628	34	0.575758	0.936426	33	0.125	0.353553	8	0	0	5
126	0.970588	1.14111	34	0.515152	0.97215	33	0.125	0.353553	8	0	0	5
127	0.84375	1.22104	32	0.625	1.03954	32	0	0	8	0.2	0.447214	5
128	0.59375	0.945597	32	0.625	0.832796	32	0.125	0.353553	8	0.2	0.447214	5
129	0.8125	1.25563	32	0.516129	0.724383	31	0.375	0.517549	8	0	0	5
130	0.84375	1.34667	32	0.933333	1.25762	30	0.285714	0.48795	7	0	0	5
131	0.96875	1.37921	32	0.793103	0.977581	29	0.166667	0.408248	6	0	0	5
132	0.9375	1.34254	32	0.448276	0.783135	29	0	0	5	0	0	5
133	1	1.21814	32	0.428571	0.57275	28	0	0	5	0	0	5
134	0.59375	1.10306	32	0.535714	0.881167	28	0	0	5	0	0	5
135	0.903226	1.49119	31	0.814815	1.14479	27	0	0	5	0	0	5
136	0.967742	1.68293	31	0.423077	0.577794	26	0	0	5	0	0	5
137	0.935484	1.03071	31	0.692308	0.788377	26	0	0	5	0.2	0.447214	5
138	0.967742	1.0483	31	0.56	1.00333	25	0.2	0.447214	5	0.4	0.547723	5
139	0.566667	1.22287	30	0.56	0.711805	25	0.2	0.447214	5	0.2	0.447214	5
140	0.827586	1.5369	29	0.68	0.802081	25	0	0	5	0	0	4
141	0.814815	1.0755	27	0.478261	0.947224	23	0	0	5	0	0	4
142	1	1.51911	27	0.391304	0.782718	23	0	0	5	0	0	4
143	0.807692	0.980581	26	0.608696	0.782718	23	0	0	5	0.25	0.5	4
144	0.833333	1.12932	24	0.5	0.912871	22	0	0	5	0.333333	0.57735	3
145	0.636364	1.00216	22	0.9	1.07115	20	0	0	5	0.333333	0.57735	3
146	0.952381	1.24403	21	1.05263	1.02598	19	0	0	5	0.333333	0.57735	3
147	1.09524	1.7293	21	0.611111	0.697802	18	0	0	5	1	1.41421	2
148	1.09524	1.84132	21	0.722222	0.826442	18	0	0	5	0.5	0.707107	2
149	1	2.04939	21	1	1.28338	18	0.2	0.447214	5	0		1
150	0.809524	1.24976	21	1.27778	1.4061	18	0.2	0.447214	5	0		1
151	1.14286	2.30837	21	0.411765	0.618347	17	0	0	4	0		1
152	1.35	2.15883	20	0.647059	0.86177	17	0	0	4	0		1
153	0.894737	1.41007	19	0.411765	0.87026	17	0	0	4	1		1
154	1.05263	1.74718	19	0.588235	0.87026	17	0.25	0.5	4	0	0	24
155	0.833333	1.09813	18	0.625	0.885061	16	0.5	0.57735	4	0	0	24
156	0.588235	0.87026	17	0.1875	0.403113	16	0.333333	0.57735	3	0	0	24
157	0.6875	1.07819	16	0.375	0.806226	16	0.333333	0.57735	3	0	0	24
158	0.3125	0.60208	16	0.4375	0.512348	16	0	0	2	0	0	24
159	0.6875	0.946485	16	0.5625	0.727438	16	0	0	2	0	0	24
160	0.466667	0.99043	15	0.4375	0.629153	16	0	0	2	0	0	24
161	0.666667	0.816497	15	0.733333	0.798809	15	0	0	2	0	0	24
162	0.714286	1.32599	14	0.857143	1.23146	14	0	0	2	0	0	24
163	0.785714	0.699293	14	0.307692	0.480384	13	0	0	2	0	0	24
164	0.785714	1.12171	14	0.461538	0.77625	13	0	0	2	0	0	24
165	0.928571	1.85904	14	0.230769	0.438529	13	0	0	2	0	0	24
166	0.857143	0.949262	14	0.307692	0.480384	13	0	0	2	0	0	24
167	0.857143	1.29241	14	0.272727	0.467099	11	0	0	2	0	0	24
168	1.07143	1.38477	14	0.727273	0.904534	11	0	0	2	0	0	24
169	0.785714	0.974961	14	0.454545	0.687552	11	0	0	2	0	0	24
170	0.857143	1.09945	14	0.363636	0.504525	11	0	0	2	0	0	24
171	0.857143	0.770329	14	0.636364	0.924416	11	0	0	2	0	0	24
172	0.928571	1.26881	14	0.9	0.994429	10	0	0	2	0	0	24
173	0.928571	1.38477	14	0.666667	0.866025	9	0	0	2	0	0	24
174	1	1.41421	14	0.444444	1.01379	9	0	0	2	0	0	24
175	1	1.1094	14	0.333333	0.707107	9	0	0	2	0	0	24
176	0.285714	0.468807	14	1.22222	1.09291	9	0	0	2	0	0	24
177	0.615385	1.19293	13	0.5	0.755929	8	0	0	2	0	0	24
178	0.538462	0.77625	13	0.571429	0.9759	7	0	0	2	0	0	24
179	1.07692	1.18754	13	0.142857	0.377964	7	0	0	2	0	0	24
180	0.615385	0.869718	13	0.285714	0.48795	7	0	0	2	0	0	24
181	1.23077	0.83205	13	0.285714	0.48795	7	0	0	2	0	0	24
182	0.6	0.699206	10	0.571429	1.13389	7	0	0	2	0	0	24
183	0.8	0.788811	10	0.428571	0.786796	7	0	0	2	0	0	24
184	0.8	0.918937	10	0.285714	0.48795	7	0	0	2	0	0	24
185	0.8	1.0328	10	0.142857	0.377964	7	0	0	2	0	0	24
186	1	1.56347	10	0.142857	0.377964	7	0	0	2	0	0	24
187	0.6	0.966092	10	0.142857	0.377964	7	0	0	2	0	0	24
188	0.6	0.843274	10	0.714286	0.755929	7	0	0	2	0	0	24
189	1.1	1.52388	10	0.833333	1.32916	6	0	0	2	0	0	24
190	0.7	1.05935	10	0.166667	0.408248	6	0	0	2	0	0	24
191	0.666667	0.866025	9	0.333333	0.516398	6	0	0	2	0	0	24
192	1	1	9	0.333333	0.816497	6	0	0	2	0	0	24
193	1.22222	1.56347	9	0.166667	0.408248	6	0	0	2	0	0	24
194	0.777778	0.833333	9	0.166667	0.408248	6	0	0	2	0	0	24
195	1.11111	0.927961	9	0	0	6	0	0	2	0	0	24
196	0.444444	0.726483	9	0.166667	0.408248	6	0	0	2	0	0	24
197	1.11111	0.600925	9	0	0	5	0	0	2	0	0	24
198	1	0.707107	9	0.4	0.547723	5	0	0	2	0	0	24
199	0.777778	0.666667	9	0	0	4	0	0	2	0	0	24
200	0.888889	1.2693	9	0.25	0.5	4	0	0	2	0	0	24
201	0.444444	0.527046	9	0.25	0.5	4	0	0	2	0	0	24
202	0.555556	0.527046	9	0.25	0.5	4	0.5	0.707107	2	0	0	24
203	0.555556	0.881917	9	0.5	1	4	0	0	1	0	0	24
204	0.444444	0.527046	9	0.25	0.5	4	0	0	1	0	0	24
205	0.142857	0.377964	7	0	0	4	0	0	1	0	0	24
206	0.428571	0.534522	7	0	0	4	0	0	1	0	0	24
207	0.285714	0.48795	7	0	0	4	0	0	1	0	0	24
208	0	0	7	0	0	4	0	0	1	0	0	24
209	0.428571	0.786796	7	0	0	4	0	0	1	0	0	24
210	0.571429	0.786796	7	0.75	0.957427	4	0	0	1	0	0	24
211	0.571429	0.534522	7	0.333333	0.57735	3	0	0	1	0	0	24
212	0.285714	0.48795	7	0	0	3	0	0	1	0	0	24
213	0.285714	0.755929	7	0.333333	0.57735	3	0	0	1	0	0	24
214	0.285714	0.755929	7	0.666667	1.1547	3	0	0	1	0	0	24
215	0.714286	1.49603	7	0.5	0.707107	2	0	0	1	0	0	24
216	0.714286	1.25357	7	0.5	0.707107	2	0	0	1	0	0	24
217	0.142857	0.377964	7	0	0	2	0	0	1	0	0	24
218	0.571429	0.786796	7	0	0	2	0	0	1	0	0	24
219	0.285714	0.48795	7	0	0	2	0	0	1	0	0	24
220	0	0	7	0	0	2	0	0	1	0	0	24
221	0.142857	0.377964	7	0.5	0.707107	2	0	0	1	0	0	24
222	0.142857	0.377964	7	0	0	1	0	0	1	0	0	24
223	0.142857	0.377964	7	0	0	1	0	0	1	0	0	24
224	0.142857	0.377964	7	1	0	1	0	0	1	0	0	24
225	0.285714	0.48795	7	0	0	1	0	0	1	0	0	24
226	0.285714	0.48795	7	0	0	1	0	0	1	0	0	24
227	0	0	7	0	0	1	0	0	1	0	0	24
228	0.142857	0.377964	7	0	0	1	0	0	1	0	0	24
229	0.285714	0.48795	7	0	0	1	0	0	1	0	0	24
230	0.428571	0.534522	7	0	0	1	0	0	1	0	0	24
231	0.5	0.547723	6	0	0	1	0	0	1	0	0	24
232	0.5	0.83666	6	0	0	1	0	0	1	0	0	24
233	0	0	5	0	0	1	0	0	1	0	0	24
234	0	0	5	0	0	1	0	0	1	0	0	24
235	0.2	0.447214	5	0	0	1	0	0	1	0	0	24
236	0.2	0.447214	5	0	0	1	0	0	1	0	0	24
237	0	0	4	0	0	1	0	0	1	0	0	24
238	0	0	4	1	0	1	0	0	1	0	0	24
239	0.25	0.5	4	0	0	1	0	0	1	0	0	24
240	0	0	4	0	0	1	0	0	1	0	0	24
241	0.25	0.5	4	0	0	1	0	0	1	0	0	24
242	0.25	0.5	4	0	0	1	0	0	1	0	0	24
243	0	0	3	1	0	1	0	0	1	0	0	24
244	0	0	3	0	0	1	0	0	1	0	0	24
245	0	0	3	0	0	1	0	0	1	0	0	24
246	0.333333	0.57735	3	0	0	1	0	0	1	0	0	24
247	0.666667	0.57735	3	0	0	1	0	0	1	0	0	24
248	1	1	3	0	0	1	0	0	1	0	0	24
249	1	1	3	0	0	1	0	0	1	0	0	24
250	1	1	3	0	0	1	1	0	1	0	0	24
251	0.666667	1.1547	3	1	0	1	1	0	1	0	0	24
252	0.333333	0.57735	3	0	0	1	0	0	1	0	0	24
253	0.333333	0.57735	3	0	0	1	0	0	1	0	0	24
254	0.333333	0.57735	3	0	0	1	0	0	1	0	0	24
255	0.333333	0.57735	3	0	0	1	0	0	1	0	0	24
256	0.5	0.707107	2	1	0	1	0	0	1	0	0	24
257	0	0	1	0	0	24	0	0	1	0	0	24
258	0	0	1	0	0	24	0	0	1	0	0	24
259	0	0	1	0	0	24	0	0	1	0	0	24
260	1	0	1	0	0	24	0	0	1	0	0	24
261	1	0	1	0	0	24	0	0	1	0	0	24
262	0	0	24	0	0	24	0	0	1	0	0	24
263	0	0	24	0	0	24	0	0	1	0	0	24
264	0	0	24	0	0	24	0	0	1	0	0	24
265	0	0	24	0	0	24	0	0	1	0	0	24
266	0	0	24	0	0	24	1	0	1	0	0	24
267	0	0	24	0	0	24	0	0	1	0	0	24
268	0	0	24	0	0	24	0	0	1	0	0	24
269	0	0	24	0	0	24	1	0	1	0	0	24
270	0	0	24	0	0	24	1	0	1	0	0	24
271	0	0	24	0	0	24	0	0	24	0	0	24
272	0	0	24	0	0	24	0	0	24	0	0	24
273	0	0	24	0	0	24	0	0	24	0	0	24
274	0	0	24	0	0	24	0	0	24	0	0	24
275	0	0	24	0	0	24	0	0	24	0	0	24
276	0	0	24	0	0	24	0	0	24	0	0	24
277	0	0	24	0	0	24	0	0	24	0	0	24
278	0	0	24	0	0	24	0	0	24	0	0	24
279	0	0	24	0	0	24	0	0	24	0	0	24
280	0	0	24	0	0	24	0	0	24	0	0	24
281	0	0	24	0	0	24	0	0	24	0	0	24
282	0	0	24	0	0	24	0	0	24	0	0	24
283	0	0	24	0	0	24	0	0	24	0	0	24
284	0	0	24	0	0	24	0	0	24	0	0	24
285	0	0	24	0	0	24	0	0	24	0	0	24
286	0	0	24	0	0	24	0	0	24	0	0	24
287	0	0	24	0	0	24	0	0	24	0	0	24
288	0	0	24	0	0	24	0	0	24	0	0	24
289	0	0	24	0	0	24	0	0	24	0	0	24
290	0	0	24	0	0	24	0	0	24	0	0	24
291	0	0	24	0	0	24	0	0	24	0	0	24
292	0	0	24	0	0	24	0	0	24	0	0	24
293	0	0	24	0	0	24	0	0	24	0	0	24
294	0	0	24	0	0	24	0	0	24	0	0	24
295	0	0	24	0	0	24	0	0	24	0	0	24
296	0	0	24	0	0	24	0	0	24	0	0	24
297	0	0	24	0	0	24	0	0	24	0	0	24
298	0	0	24	0	0	24	0	0	24	0	0	24
299	0	0	24	0	0	24	0	0	24	0	0	24
300	0	0	24	0	0	24	0	0	24	0	0	24
301	0	0	24	0	0	24	0	0	24	0	0	24

## Sheet: Fig 7E&G
Fig 7E and G	Morphology of GFP+ cells in EGL explants
	7E										7G
	DIV1				DIV2						bipolar with one process attached to the explant
	multipolar		bipolar		multipolar		bipolar				DIV1		DIV2
genotype	PlxnB2fl/fl	En1cre;Plxnb2fl/fl	PlxnB2fl/fl	En1cre;Plxnb2fl/fl	PlxnB2fl/fl	En1cre;Plxnb2fl/fl	PlxnB2fl/fl	En1cre;Plxnb2fl/fl		genotype	PlxnB2fl/fl	En1cre;Plxnb2fl/fl	PlxnB2fl/fl	En1cre;Plxnb2fl/fl
% of all GFP+ cells in one explant that has certain morphology, averaged per explant	77.3913	83.3333	22.6087	16.6667	12.3077	0	81.1321	79.1667		% of all GFP+ cells in one explant that has certain morphology, averaged per explant	38.4615	33.3333	67.3077	32
	73.2026	87.5	26.7974	12.5	18.8679	20.8333	88	75			29.2683	100	33.3333	33.3333
	52.5773	53.5714	47.4227	46.4286	12	25	89.4737	77.4194			52.1739	53.8462	68.6275	33.3333
	34	27.2727	66	72.7273	10.5263	22.5806	82.6923	77.7778			66.6667	50	33.3333	41.6667
	80.6452	65	19.3548	35	17.3077	22.2222	75.9259	84.6154			58.3333	28.5714	59.0909	21.4286
	54.7619	62.5	45.2381	37.5	24.0741	15.3846	100	83.3333			39.4737	44.4444	41.1765	21.4286
	41.3333	64.2857	58.6667	35.7143	0	16.6667	94.4828	50			45.4545	80	57.265	40
	18.6441	73.6842	81.3559	26.3158	5.51724	50	83.8235	71.6216			83.3333	30	40.7407	29.1667
	48.6486	51.5152	51.3514	48.4848	16.1765	28.3784	90.8046	66.6667			31.5789	50	46.1538	37.037
	41.4634	60	58.5366	40	9.1954	33.3333	89.4737	88.2353			72.9167	50	43.8462	36.3636
	60.6557	64.7059	39.3443	35.2941	10.5263	11.7647	78.3784	76.4706			37.5	50	44.6809	40.7407
	71.1111	40	28.8889	60	21.6216	23.5294	89.2308	60			23.0769	55.5556	53.4884	48.6111
	51.8987	74.4186	48.1013	25.5814	10.7692	6.89655	84.3137	93.1034			36.8421	90.9091	65.1163	50
	55.5556	68.1818	44.4444	31.8182	15.6863	33.3333	80	66.6667			83.3333	28.5714	66.6667	45.4545
	79.1209	66.6667	20.8791	33.3333	20	5.97015	88	94.0299			52.6316	100	76.9231	25
	46.2687	50	53.7313	50	12	5.55556	95.5556	94.4444			58.3333	42.8571	55.6391	23.2143
	20.5882	81.8182	79.4118	18.1818	4.44444	0	92	100			85.1852	0	56.25
	60.8696	64.1026	39.1304	35.8974	8	7.8125	100	92.1875			55.5556	42.8571	48.1481
	59.2593	78.7234	40.7407	21.2766	0	4.7619	73.913	95.2381			63.6364	30	57.5758
	35.7143	81.5789	64.2857	18.4211	26.087		92.1569				44.4444	71.4286	57.3171
	30.6452	80	69.3548	20	7.84314		72				48.8372	75
	50.6494	66.6667	49.3506	33.3333	28		93.7931				50	80
	70.8333	46.6667	29.1667	53.3333	6.2069		100				61.9048	58.3333
	48.3871	54.5455	51.6129	45.4545	0		91.4286				56.25	60
	40	80.7692	60	19.2308	8.57143		84.127				44.4444	60
	38.3333	61.1111	61.6667	38.8889	15.873		95.1807				29.7297	21.4286
	27.5862	65.5172	72.4138	34.4828	4.81928		86.4583				71.4286	50
	69.8113	80	30.1887	20	13.5417		88.6957				50	14.2857
	49.3671	71.4286	50.6329	28.5714	11.3043		93.4959				45	25
	43.4783	50	56.5217	50	6.50407		100				65.3846	33.3333
	56.0976	60	43.9024	40	0		94.2029				44.4444	50
	33.3333	69.2308	66.6667	30.7692	5.7971						46.4286	25
	16.6667	73.913	83.3333	26.087							100	83.3333
	25		75								50
	12.1951		87.8049								55.5556
	35.3846		64.6154								50
	52		48								25
	62.963		37.037								50
	40		60								58.3333
	66.4		33.6								40.4762
	31.746		68.254								44.186
	81.3953		18.6047								25
	62.5		37.5								50
	40.3846		59.6154								80.6452
	64.2857		35.7143								48
	35.1852		64.8148								51.4286
Number of values	46	33	46	33	32	19	31	19		Number of values	46	33	20	16
Minimum	12.2	27.27	18.6	12.5	0	0	72	50		Minimum	23.08	0	33.33	21.43
25% Percentile	35.33	57.27	37.38	23.43	5.9	5.97	83.82	71.62		25% Percentile	43.26	30	44.05	26.04
Median	49.01	65.52	50.99	34.48	10.65	16.67	89.47	79.17		Median	50	50	55.94	34.85
75% Percentile	62.62	76.57	64.67	42.73	16.1	25	94.2	93.1		75% Percentile	59.23	65.71	63.61	41.44
Maximum	81.4	87.5	87.8	72.73	28	50	100	100		Maximum	100	100	76.92	50
Mean	48.88	65.42	51.12	34.58	11.36	17.58	88.67	80.31		Mean	52.19	50.55	53.63	34.92
Std. Deviation	17.97	13.61	17.97	13.61	7.526	13.17	7.648	13.4		Std. Deviation	16.89	24.51	12.02	9.251
Std. Error of Mean	2.649	2.37	2.649	2.37	1.33	3.022	1.374	3.074		Std. Error of Mean	2.49	4.267	2.688	2.313

## Sheet: Fig 7F
Fig 7F	Explant GFP+ GCN morphology
	DIV1
	leading process		trailing process
genotype	PlxnB2fl/fl	En1cre;Plxnb2fl/fl	PlxnB2fl/fl	En1cre;Plxnb2fl/fl
process length (um)	136.081	43.6262	28.0165	18.8495
	61.433	36.7427	21.6544	25.9223
	72.3155	50.2068	106.531	27.7893
	136.521	135.282	70.6942	18.299
	55.1563	70.1301	157.53	8.73786
	42.267	39.4971	29.4883	8.02039
	87.7107	16.6311	51.7369	7.84272
	97.435	91.3214	49.3573	30.0515
	154.739	64.366	39.0282	52.0961
	49.5981	37.0097	45.432	42.6922
	50.6942	47.0971	37.4786	62.0699
	57.4204	117.577	37.1748	39.4291
	47.9204	47.6136	78.6602	14.9476
	67.2107	124.964	31.0718	58.3243
	45.1301	53.1233	77.7883	45.3854
	108.769	117.036	34.4058	27.1408
	44.067	128.246	105.692	67.9524
	66.4272	50.0058	15.5641	19.6097
	36.835	88.9408	61.0485	24.3107
	28.2913	216.683	85.6223	32.9524
	46.932	53.0602	91.8874	29.0301
	85.7359	23.9709	103.951	20.2
	190.345	97.2699	73.466	11.8777
	43.8447	35.8058	71.4728	29.0301
	97.0903	25.3689	38.2854	20.2
	104.871	26.2	45.1903	34.832
	26.2	34.832	110.416	40.5534
	116.322	35.8058	28.1563	59.3883
	20.2961	25.3689	72.7534	27.8126
	44.3641	26.2	73.3922	23.7553
	46.9194	11.8777	105.411	60.3398
	36.7718	81.7369	354.271	33.3534
	17.201	108.82	45.8301	101.841
	104.211	28.0049	109.01	41.6612
	51.0748	91.1117	19.6184	66.6194
	30.9311	104.544	95.9214	144.16
	76.0398	69.2233	26.8214	51.8631
	78.3252	87.1184	197.563	90.1621
	96.3019	72.4544	117.366	8.9534
	83.0408	83.8136	48.0709	41.0883
	135.231	92.7068	100.521	38.5379
	147.101	166.761	72.8204	32.3903
	222.041	16.8777	73.3913	60.0359
	86.0971	50.0476	30.932	61.8379
	156.951	32.2359	62.5981	42.3155
	89.5019	27.8262	50.5913	21.4369
	201.461	28.7709	78.9728	12.9951
	29.5107	33.9194	93.365	53.8602
	64.1505	61.3951	17.7282	18.3097
	176.695	72.4087	9.5699	30.6291
	96.4524	19.8427	173.128	29.1068
	122.221	59.8767	148.353	107.454
	86.099	79.7874	79.4427	9.78058
	48.0466	45.5544	42.8146	59.5427
	191.33	22.7233	42.199	64.5388
	111.902	54.766	48.3544	86.8252
	153.833	226.048	65.9922	89.1951
	62.2874	57.266	56.2155	21.4476
	45.0136	31.7485	75.4534	66.1806
	64.4417	50.9544	37.0864	9.80485
	40.1893	116.738	181.381	34.8495
	260.83	130.26	111.423	17.0942
	102.559	46.1845	54.5718	26.4777
	88.1456	92.1272	50.2427	38.1078
	74.4476	41.932	38.2602	33.566
	128.902	20.4544	50.567	14.9534
	247.368	41.9049	104.64	79.5495
	91.2981	52.0689	180.564	23.8049
	73.5602	92.201	19.6184	35.5233
	66.9748	28.5922	12.1738	38.6136
	22.334	42.5825	143.36	16.4767
	36.2602	76.5427	156.283	16.2728
	121.011	21.9243	51.434	31.9981
	66.7136	57.2835	61.368	29.3738
	164.899	79.9456	32.4165	54.9146
	200.647	39.5058	33.3252	29.4573
	111.717	21.4049	91.6553	38.9505
	220.465	22.0097	194.606	58.8311
	37.0369	37.3058	145.25	74.5388
	61.0204	16.7204	35.167	21.3641
	75.2825	17.8495	112.724	55.0146
	62.3728	76.1854	174.38	95.966
	234.88	47.7194	47.401	14.8922
	156.515	19.6039	36.0194	67.8777
	188.047	28.9019	69.1893	36.6709
	199.663	17.633	42.932	71.9835
	50.4243	106.914	34.7981	28.2913
	96.4068	39.833	343.246	28.1854
	101.825	228.534	92.2903
	143.029	96.6175	75.7233
	57.5981	92.5136	278.833
	32.235	161.767	81.1932
	186.455	345.043	46.2019
	101.606		43.2223
	213.513		112.871
	71.6126		90.1447
	21.6709		63.5563
	27.068		76.8641
	22.3223		120.171
	42.5796		41.3301
	31.9951		78.9136
	25.9223		89.0476
	114.215		185.088
	59.0136		188.493
	48.699		47.2942
	54.9893		21.0058
	126.504		31.7913
	35.0165		252.586
	42.7689		127.736
	23.4932		49.0961
	102.8		14.7903
	46.4786		62.4942
	125.921		109.209
	102.273		72.4408
	132.57		61.5078
	116.829		59.7641
	28.3398		55.6505
	167.067		40.5136
	66.9456		44.5417
	113.49		94.5466
	149.228		20.4942
	355.636		27.899
	218.364		42.6243
	42.5689		140.33
	72.2621		84.2175
	19.9466		121.791
	53.068		322.024
	140.429		48.8864
	97.2718		87.299
	91.4194		19.9466
	189.314		98.3311
	108.308		80.1825
	206.214		79.9
	93.5631		129.024
	182.714		37.2427
	56.4		65.7583
	58.8883		72.2398
	22.2136		35.2437
	49.1369		147.164
	32.1388		133.752
	112.63		58.0854
	129.824		228.333
	98.7767		140.87
	127.623		49.3874
	60.6641		170.166
	84.1942		103.298
	89.7981		165.888
	40.7456		68.8767
	187.625		52.2291
	83.1544		153.063
	197.868		120.522
	128.15		92.7553
	87.4243		174.77
	25.7835		36.234
	53.0359		194.668
	91.5903		47.7068
	60.6981		70.9485
	246.097		16.5505
	44.9767		123.577
	31.8612		30.2825
	219.162		51.1117
	180.677		30.232
	95.5592		127.184
	16.3951		152.125
	57.6981		301.713
	21.3864		83.4806
	82.8039		156.74
	198.09		94.867
	144.862		84.5359
	54.1563		58.9932
	101.606		93.3049
	246.263		91.3631
	111.978		37.9398
	95.9689		13.7845
	93.9369		56.7262
	194.216		219.815
	35.5631		52.1233
	177.455		20.4592
	247.483		58.4786
	70.965		157.245
	231.63		40.232
	51.4563		123.53
	70.4223		122.883
	77.2757		96.8961
	50.2243		23.7437
	89.4728		19.9039
	68.8641		53.3748
	168.857		64.3932
	168.641		31.6951
	78.2534		30.6932
	290.092		30.2893
	302.84		78.1835
	305.88		46.6175
	165.05		23.6913
	185.872		66.3233
	72.3806		47.6825
	145.9		52.668
	50.6417		17.1078
	57.8592		175.702
	207.851		116.076
	179.986		75.1874
	39.3767		109.554
	50.7194		108.345
	81.6447		31.0117
	150.721		52.3194
	74.8175		130.418
	189.205		93.166
	147.282		160.017
	120.744		52.2738
	163.188		41.6388
	56.3777		74.8262
	40.7301		161.862
	106.281		62.2718
	217.182		94.3214
	43.2447		311.617
	171.383		134.559
	277.184		36.8796
	78.1505		26.332
	230.76		85.6
	59.5932		25.6078
	163.596		34.034
	153.72		30.1874
	366.519		48.3417
	181.385		20.9291
	83.435		55.2981
	127.835		61.199
	75.7524		26.4534
	59.4913		118.692
	278.213		129.253
	111.015		36.3748
	76.3165		19.1272
	194.647		30.0777
	169.116		90.4505
	145.662		66.8845
	185.664		15.8282
	148.532		45.0107
	258.036		18.8117
	124.143		23.5806
	69.6913		20.8699
	159.226		16.834
	179.174		37.5039
	195.292		134.659
	131.453		101.057
	55.8146		44.3951
	201.295		120.386
	199.201		41.9087
	97.0903		45.3854
	94.4709		15.466
	52.6029		43.2816
	131.786		9.29223
	33.0951		18.4777
	89.8612		92.1068
	109.109		64.2631
	797.088		83.3495
	144.955		32.4311
	135.844		53.8243
	230.155		38.7301
	117.426		7.08835
	91.765		114.125
	29.632		110.166
	26.1447		71.5738
	31.8243		40.1913
	35.5175		92.8291
	33.0379		85.9495
	124.852		102.761
	146.447		191.324
	94.8583		45.8214
	143.523		46.1049
	42.9777		157.808
	386.576		53.9699
	46.0068		101.777
	113.919		167.048
	53.4796		17.5913
	99.9612		27.5369
	98.4621		105.76
	60.4806		47.2417
	31.0068		30.5049
	42.667		75.466
	179.84		37.2544
	21.2495		157.198
	14.7553		67.4767
	57.2379		79.1883
	107.894		137.777
	22.9573		55.9165
	74.0505		86.5282
	74.2951		29.4233
	176.847		55.3825
	31.3864		61.1311
	115.468		26.7563
	120.536		109.367
	110.117		48.4563
	151.704		97.367
	141.434		52.3534
	104.123		11.1534
	136.912		18.0573
	269.577
	230.812
	184.978
	52.901
	18.7524
	35.8117
	131.675
	58.4447
	46.3214
	47.9757
	145.584
	160.576
	28.1767
	41.5583
	29.634
	29.466
	32.4398
	114.716
	111.534
	57.0184
	105.774
	51.7961
	39.4466
	58.201
	36.4379
	53.0573
	35.0864
	117.087
	88.1777
	35.1107
	77.8408
	100.17
	74.3534
	89.6437
	14.1126
	47.9359
	138.185
	176.961
	135.095
	395.495
	157.065
	102.183
	31.0282
	72.7398
	108.843
	89.767
	172.668
	103.101
	227.445
	40.967
	47.8039
	44.9718
	32.5194
	60.5068
	94.0359
	108.327
	91.2087
	111.104
	117.289
	81.2136
	198.489
	41.567
	64.4505
	94.1728
	81.9573
	89.8874
	106.171
	62.6117
	40.6534
	56.1495
	48.6777
	27.3699
	109.376
	82.7612
	101.335
	165.986
	107.726
	99.9864
	114.456
	56.1505
	43.1883
	148.534
	168.132
	46.8097
	154.857
	37.4767
	175.528
	99.0612
	78.6961
	38.4709
Number of values	385	93	295	88
Minimum	14.11	11.88	7.088	7.843
25% Percentile	50.67	30.33	37.94	21.44
Median	91.21	50.21	62.6	33.46
75% Percentile	144.9	91.22	105.4	58.7
Maximum	797.1	345	354.3	144.2
Range	783	333.2	347.2	136.3
Mean	106	67.6	79.47	40.9
Std. Deviation	76.48	54.17	58.68	25.92
Std. Error of Mean	3.898	5.617	3.416	2.763
