# Supplementary material for: Plexin-B2 controls the timing of differentiation and the motility of cerebellar granule neurons
Source: eLife. 2021 Jun 8;10:e60554. doi: 10.7554/eLife.60554 (PMC8211449; doi:10.7554/eLife.60554)
Supplement: Figure 8—source data 1. [file elife-60554-fig8-data1.xlsx]

## Sheet: Fig 8B&C
Fig 8 B&C	Migration of bipolar CGNs in EGL explant cultures
	B				C
	Velocity of bipolar cells				% of total distance in negative direction		% of total time in negative direction
genotype	PlxnB2fl/fl	En1cre;Plxnb2fl/fl		genotype	PlxnB2fl/fl	En1cre;Plxnb2fl/fl	PlxnB2fl/fl	En1cre;Plxnb2fl/fl
velocity (um/h)	29.5216	33.5192		relative negative movement (% of total movement)	0	45.4348	0	52.6316
	19.2791	22.4855			0.951724	32.6753	5.66038	37.7358
	26.8475	18.2717			10.8085	37.4646	31.0345	45.5696
	35.3259	44.3963			7.94431	53.2258	8	41.6667
	23.0294	32.2539			12.1176	11.2374	17.1875	16.9231
	28.2109	30.6215			5.28015	52.6543	15.3846	65
	27.3502	29.7388			28.9483	72.9485	30	67.5676
	20.9396	17.2198			1.45128	58.6347	7.69231	49.0566
	24.4616	21.0993			4.17389	33.8333	15.7895	37.2093
	21.1237	23.899			15.8565	31.075	24.6154	46.9388
	39.3686	40.6448			1.70021	41.7544	11.1111	47.619
	24.709	24.82			23.4499	34.206	37.5	31.1475
	17.6396	25.985			8.23916	23.077	10.4167	34.6154
	20.2596	35.5938			1.32206	15.6545	3.7037	18.9873
	14.6457	33.7553			12.5226	90.5965	19.3548	85.1852
	35.9734	13.9012			1.49786	40.9628	5.35714	38.4615
	28.6141	19.9709			25.1136	46.4073	32.8358	50
	26.6912	32.6007			20.3767	56.663	25	60
	37.0393	41.6001			0	3.54313	0	5.55556
	11.4649	26.6684			2.80519	21.3197	8	25
	18.6034	21.6861			4.03315	10.5176	17.8571	17.8082
	41.7863	19.5611			2.81946	9.94891	5.71429	16.3636
	28.2425	16.0321			17.5994	6.34306	30.1587	13.4615
	30.6695	25.7529			4.22105	8.83832	9.25926	17.0213
	24.6149	30.6937			1.56268	53.812	5	53.4884
	17.967	38.1273			1.18064	14.9215	3.92157	17.1875
	13.9849	24.3068			5.55321	12.7636	8.10811	22.4138
	32.2198	24.6651			0.581141	10.3891	3.33333	21.8182
	24.4129	22.4587			8.58072	47.9843	15.0943	47.1698
	18.7566	19.2869			7.55923	31.9164	14.2857	36.0465
	36.5644	49.0362			0.509436	9.81368	3.22581	11.1111
	14.3287	35.9707			0.695638	50.6288	4.08163	52
	17.1721	25.4564			2.1649	1.74925	7.69231	5.26316
	31.2565	30.3995			1.64023	25.6023	2.63158	28.5714
	41.681	18.7377			41.8468	36.8959	50	46.6667
	32.9205	29.6021			6.08276	58.231	13.5593	59.5238
	30.4513	22.3385			4.13963	23.4852	6.66667	29.6296
	15.728	26.1729			3.97714	50.6209	12.8205	56.5217
	31.9625	31.1045			9.16408	13.0266	14.9254	18.0723
	30.2147	28.237			40.6026	22.9568	42.8571	25
	38.9587	22.1357			21.0362	38.6985	25.4237	39.3939
	17.1309	21.2918			4.78301	38.421	12.1212	46.1538
	36.0124	27.9651			13.232	55.3943	20.3125	53.1915
	36.9044	20.4764			3.96044	12.2978	11.9048	17.7778
	28.6116	49.2986			31.8911	0.795403	32.1429	5.26316
Number of values	45	45		Number of values	45	45	45	45
Minimum	11.46	13.9		Minimum	0	5.263	11.46	13.9
25% Percentile	19.02	21.49		25% Percentile	5.687	17.94	19.02	21.49
Median	27.35	25.98		Median	12.12	37.21	27.35	25.98
75% Percentile	32.57	32.43		75% Percentile	22.46	49.53	32.57	32.43
Maximum	41.79	49.3		Maximum	50	85.19	41.79	49.3
Mean	26.75	27.77		Mean	15.15	35.86	26.75	27.77
Std. Deviation	8.22	8.405		Std. Deviation	11.89	18.76	8.22	8.405
Std. Error of Mean	1.225	1.253		Std. Error of Mean	1.773	2.796	1.225	1.253
