# Supplementary material for: Plexin-B2 controls the timing of differentiation and the motility of cerebellar granule neurons
Source: eLife. 2021 Jun 8;10:e60554. doi: 10.7554/eLife.60554 (PMC8211449; doi:10.7554/eLife.60554)
Supplement: Figure 9—source data 1. [file elife-60554-fig9-data1.xlsx]

## Sheet: Fig 9B,C,D
Fig 9B,C,D	Cells migrating from EGL explants
	B				C				D
	DAPI				EdU				Colocalization EdU and H3P
genotype	PlxnB2fl/fl	En1cre;Plxnb2fl/fl		genotype	PlxnB2fl/fl	En1cre;Plxnb2fl/fl		genotype	PlxnB2fl/fl	En1cre;Plxnb2fl/fl
number of cells per explant	945	458		number of cells per explant	55	67		% of H3P+ cells of EdU+ cells, averaged per explant	0	7.46269
	647	851			99	64			0	0
	765	652			79	88			0	5.68182
	657	549			151	41			0	12.1951
	930	603			20	76			0	22.3684
	1014	560			59	126			11.8644	9.52381
	678	441			22	76			0	0
	419	752			27	112			0	19.6429
	676	382			64	94			4.6875	9.57447
	1019	453			122	75			7.37705	12
	564	798			31	125			12.9032	8.8
	864	824			52	141			5.76923	4.25532
	221	161			29	33			31.0345	21.2121
	997	280			226	50			8.40708	4
	430	291			32	56			3.125	8.92857
	972	162			79	14			0	0
	1052	177			141	73			13.4752	0
	1076	209			134	14			0	21.4286
	1235	543			150	221			0	11.3122
	607	527			84	120			2.38095	14.1667
	623	217			63	8			11.1111	37.5
	595	340			69	50			21.7391	6
	1236	574			285	48			0	18.75
	162	669			2	136			100	15.4412
	848	648			127	77			8.66142	20.7792
	320	581			11	79			72.7273	10.1266
	1314	779			79	99			18.9873	11.1111
	1087	597			82	71			20.7317	12.6761
	601	334			38	17			21.0526	23.5294
	880	423			71	90			28.169	22.2222
	367	253			8	20			25	25
	491	435			13	23			7.69231	26.087
	961	662			84	41			11.9048	24.3902
	623	332			54	24			16.6667	33.3333
	660				46				19.5652
	424				19				10.5263
Number of values	36	34		Number of values	36	34		Number of values	36	34
Minimum	162	161		Minimum	2	8		Minimum	0	0
25% Percentile	571.8	321.8		25% Percentile	29.5	39		25% Percentile	0	7.097
Median	677	492.5		Median	63.5	72		Median	8.534	12.1
75% Percentile	990.8	649		75% Percentile	95.25	95.25		75% Percentile	19.42	21.63
Maximum	1314	851		Maximum	285	221		Maximum	100	37.5
Mean	748.9	485.8		Mean	75.19	72.03		Mean	13.77	14.1
Std. Deviation	293.8	202.7		Std. Deviation	61.17	45.79		Std. Deviation	20.29	9.575
Std. Error of Mean	48.97	34.77		Std. Error of Mean	10.2	7.853		Std. Error of Mean	3.382	1.642

## Sheet: Fig 9F, G
Fig 9F, G	Morphology of GFP+ CGNs in explants in vitro
	F						G
	DIV1						DIV 2
	multipolar		bipolar				multipolar		bipolar
genotype	PlxnB2fl/fl	En1cre;Plxnb2fl/fl	PlxnB2fl/fl	En1cre;Plxnb2fl/fl		genotype	PlxnB2fl/fl	En1cre;Plxnb2fl/fl	PlxnB2fl/fl	En1cre;Plxnb2fl/fl
	4.49438	13.3333	0	0			68.75		4.38596	31.8182
	8.92857	14.2857	0	0			50	100	6.97674	21.0526
	17.6471	13.3333	0	0			83.3333	100	2.27273	8.33333
	5.88235	33.3333	0	0			100	42.8571	0	29.1667
	6	7.69231	0	0			100	16.6667	2.32558	23.8095
	8.69565	0	0	0			92.3077	100	14.6341	18.1818
	3.22581	22.2222	0	0			100	85.7143	0	11.4286
	27.2727	3.57143	0	0			54.5455	100	2.18978	60
	5.55556	0	0	0			62.5	71.4286	19.2982	45.283
	2.94118	8.33333	0	0			92.8571	66.6667	10.1266	66.6667
	2.7027	11.3636	0	4.16667			37.5	100	15.1261	33.3333
	0	66.6667	0	0			100	50	17.2414	7.69231
	14.6341	18.75	0	0			62.5	50	17.2414	11.1111
	13.3333	6.66667	0	0			91.6667	46.1538	16.2791	34.6154
	11.1111	21.4286	0	0			83.3333	100	14.5833	7.93651
	3.22581	28.5714	0	0			50	100	11.3636	11.7647
	14.2857	11.1111	0	0			100		11.6279	5.26316
	14.2857	16	5.55556	7.14286			91.6667	80	4.34783	10.1695
	25	5.40541	0	0			50	100	0	5
	5	22.5806	0	0			85.7143		5.88235
	5.26316	18.75	2.32558	0			66.6667		4.25532
	7.69231	20	0	0			33.3333		5.55556
	13.7255	0	0	4.16667			20		5.88235
	3.33333	0	0	0			75		3.7037
	8.33333	19.0476	11.1111	0			61.5385		12.5
	17.3913	13.6364	0	0			53.8462		9.43396
	0	10.5263	0	0			37.5		2.53165
	5.40541	3.57143	0	0			50		3.61446
	17.9487	20	0	0					2.94118
	15	0	0	0					7.82609
	4.34783	0	0	0					7.27273
	7.14286	0	0	0					6.92308
	50	23.5294	0	0
	0		0			Number of values	28	17	32	19
	20		0
	8.69565		0			Minimum	20	16.67	0	5
	0		0			25% Percentile	50	50	3.109	8.333
	17.6471		0			Median	67.71	85.71	6.403	18.18
	0		0			75% Percentile	92.15	100	12.28	33.33
	6.0241		0			Maximum	100	100	19.3	66.67
	0		0
	8.57143		0			Mean	69.81	77.03	7.761	23.3
	5		0			Std. Deviation	23.84	27.01	5.67	18.31
	0		0			Std. Error of Mean	4.504	6.55	1.002	4.201
	11.1111		0
	5.26316		0
Number of values	46	33	46	33
Minimum	0	0	0	0
25% Percentile	3.306	3.571	0	0
Median	6.583	13.33	0	0
75% Percentile	14.29	20	0	0
Maximum	50	66.67	11.11	7.143
Mean	9.394	13.75	0.4129	0.469
Std. Deviation	9.142	13.24	1.837	1.566
Std. Error of Mean	1.348	2.305	0.2709	0.2726
