# Supplementary material for: Plexin-B2 controls the timing of differentiation and the motility of cerebellar granule neurons
Source: eLife. 2021 Jun 8;10:e60554. doi: 10.7554/eLife.60554 (PMC8211449; doi:10.7554/eLife.60554)
Supplement: Figure 10—figure supplement 1—source data 1. [file elife-60554-fig10-figsupp1-data1.xlsx]

## Sheet: Fig10 S1-B
Figure 1 Supplement 1-B	Cell morphology during live-imaging
	cell morphology at start of time-lapse				cell morphology at end of time-lapse
	multipolar		bipolar		multipolar		bipolar
genotype	PlxnB2fl/fl	En1cre;Plxnb2fl/fl	PlxnB2fl/fl	En1cre;Plxnb2fl/fl	PlxnB2fl/fl	En1cre;Plxnb2fl/fl	PlxnB2fl/fl	En1cre;Plxnb2fl/fl
% of all GFP+ CGNs of a certain morphology (per explant)	20	100	30	0	0	54.5455	100	45.4545
	88.8889	44.4444	11.1111	50	0	0	100	100
	6.25	94.5946	93.75	5.40541	0	7.31707	100	92.6829
	40.625	66.6667	90.625	33.3333	0	13.1579	100	86.8421
	0	26.6667	100	73.3333	0	0	100	100
	26.087	84.6154	73.913	15.3846	0	2	100	98
	19.0476	41.1765	80.9524	58.8235	0	11.7647	100	88.2353
	10	44.4444	90	55.5556	0	9.52381	100	90.4762
	26.6667	66.6667	73.3333	33.3333	0	2.5	100	97.5
	17.6471	81.0811	82.3529	18.9189	0	15.1515	100	84.8485
	58.3333	82.3529	41.6667	47.0588	0	5.43478	100	94.5652
	66.6667		33.3333		3.66972		96.3303
	39.4737		60.5263		0		100
Number of values	13	11	13	11	13	11	13	11
Minimum	0	26.67	11.11	0	0	0	96.33	45.45
25% Percentile	13.82	44.44	37.5	15.38	0	2	100	86.84
Median	26.09	66.67	73.91	33.33	0	7.317	100	92.68
75% Percentile	49.48	84.62	90.31	55.56	0	13.16	100	98
Maximum	88.89	100	100	73.33	3.67	54.55	100	100
Mean	32.28	66.61	66.27	35.56	0.2823	11.04	99.72	88.96
Std. Deviation	25.84	24.3	28.45	23.61	1.018	15.36	1.018	15.36
Std. Error of Mean	7.167	7.326	7.891	7.12	0.2823	4.633	0.2823	4.633
