# Supplementary material for: Plexin-B2 controls the timing of differentiation and the motility of cerebellar granule neurons
Source: eLife. 2021 Jun 8;10:e60554. doi: 10.7554/eLife.60554 (PMC8211449; doi:10.7554/eLife.60554)
Supplement: Figure 10—source data 1. [file elife-60554-fig10-data1.xlsx]

## Sheet: Fig 10
Fig 10	Multipolar CGNs in EGL explant cultures
	C				D				E				F
	velocity of multipolar cells				Cumulative distance of multipolar cells				Amount of divisions per hour per explant				Transition from multipolar to bipolar
genotype	PlxnB2fl/fl	En1cre;Plxnb2fl/fl		genotype	PlxnB2fl/fl	En1cre;Plxnb2fl/fl		genotype	PlxnB2fl/fl	En1cre;Plxnb2fl/fl		genotype	PlxnB2fl/fl	En1cre;Plxnb2fl/fl
Velocity (um/h)	29.819	43.6617		cumulative distance (um)	57.5068	534.3		number of divisions per hour observed in an explant	0	0.0666667		time before transition to bipolar cell (h)	2.75	14.75
	22.889	43.2489			82.0022	644.01			0	0.214286			7.5	12.5
	20.2236	11.6061			171.668	540.611			0	0.259259			7.5	5.25
	17.7717	28.7124			151.677	60.9319			0	0.185185			4	7.5
	32.9177	20.5583			71.0869	215.343			0	0			5	14.75
	21.714	32.3846			164.589	303.235			0.111111	0.0434783			13.75	9.25
	26.1144	45.5291			298.568	299.558			0.037037	0.0434783			8	12.75
	21.8671	20.5367			208.915	580.496			0	0.130435			5.75	8.5
	14.7451	12.1002			125.736	174.562			0	0			2	3.75
	20.659	15.3192			29.4902	45.3757			0.0869565	0.171429			9.5	7.5
	20.5499	25.5039			196.261	114.894			0.114286	0.114286			3.25	4.25
	18.0375	36.505			66.7871	108.391			0.171429				8	4.25
	22.1695	8.75476			144.3	155.146			0.0571429				7.75	6.75
	25.8066	8.9683			171.813	59.0946							7	12.5
	18.4471	16.5221			180.646	112.104		Number of values	13	11			5	2
	23.456	24.7567			92.2353	747.411							5.75	3.25
	20.0151	24.7811			134.872	78.4802		Minimum	0	0			9.5	4.75
	21.071	25.0704			190.144	241.265		25% Percentile	0	0.04348			21.25	5.5
	27.6941	30.0157			447.759	151.601		Median	0	0.1143			7.75	5.75
	36.5406	31.144			214.629	349.862		75% Percentile	0.09903	0.1852			6	6.75
	23.6401	31.5125			219.244	350.37		Maximum	0.1714	0.2593			8.5	7
	28.2671	32.2284			200.941	491.483							9.5	7.5
	30.8827	32.9427			268.537	220.587		Mean	0.04446	0.1117			9	7.75
	26.618	33.3202			277.944	81.479		Std. Deviation	0.05866	0.08827			6.75	10.5
	16.3044	34.9098			179.672	540.234		Std. Error of Mean	0.01627	0.02661			4.5	10.5
	24.5091	38.9843			73.3696	136.296							12.5	11.25
	30.1333	41.4906			306.363	654.558							10.5	12.25
	19.6206	41.9592			316.399	321.552							8	13
	19.0264	45.2976			156.965	202.606							8	15.25
	21.3145	72.0313			152.211	259.945							7	16.5
	34.9975	75.8007			149.201	506.796							10.25	18.75
	42.5927	30.8889			358.724	403.548							6.75	23.75
	17.4539	34.9242			287.501	154.445							16.75	21.75
	15.9095	27.4062			91.6328	698.484							9	20
	22.7228	60.7143			95.4571	417.944							7.5	15.75
	19.9628	58.6557			170.421	956.251							6	15.25
	24.2955	32.1315			179.665	586.557							5.25	13.75
	42.6633	24.5532			406.95	698.859							3.75	12.75
	47.948	31.5243			159.987	337.607							3.5	10.75
	30.0432	22.1098			167.818	141.859							2.5	10
	39.8233	42.4529			75.1079	281.9							12.25	7.75
	21.1063	61.6773			219.028	456.369							10	7.25
	41.9893	29.5677			84.425	416.322							9.25	6.75
	40.5093	18.2213			377.904	702.232							9	6
	24.9185	22.3857			192.419	132.104							6.75	5
	20.9077	32.7867			305.252	134.314							6.25	4.5
	27.344	30.5436			193.396	254.097							6	13.25
	20.4966	15.1905			184.572	404.703							5.75	6.75
	19.3039	29.3496			122.979	102.536							5.5	12.5
	36.0845	16.5473			193.039	366.871							4.75	3
	16.7028	22.4331			225.528	49.642							4	2.75
	41.1916	25.9979			96.0411	112.166							4	4.25
	26.1163	59.1399			164.766	194.984							5	5
	27.8563	25.4315			385.215	783.603							5.25	7.5
	16.4264	34.7735			139.282	69.9366							8.25	9
	29.1701	44.914			135.518	147.787							8.5	10.25
	25.088	39.1014			488.599	460.369							10	13.25
	18.1809	34.8734			131.712	351.912							10.5	14
	24.2203	37.7298			154.537	148.212							13.75	11.75
	20.8378	17.2842			333.029	235.811							14.75	11.75
	20.1394	16.9281			359.452	146.915							16.75	10.75
	17.0796	20.0707			211.464	198.905							17.25	8.5
	23.9059	30.2179			170.796	215.76							15.75	6.25
	27.333	44.6876			149.412	423.051							12	4.25
	40.7917	40.7994			211.831	525.079							7.75	3.75
	24.6818	40.3051			183.563	367.194							7	4
	47.9705	37.9064			166.602	161.22							6.75	4
	22.0517	39.1497			191.882	227.438							6.25	4.5
	34.7202	39.8822			137.823	879.399							6.25	5.5
	16.4288	35.4007			243.041	219.352							6.25	6
	13.8901	43.4131			258.753	132.753							4.5	6
	41.5975	25.6946			166.681	434.131							4	7
	25.9353	38.07			259.984	301.912							7.87671	8
	8.44264	58.1392				171.315							3.83449	9
	0.988136	38.7927				348.835							0.448793	10
		57.2781				271.549								10
		35.8542				572.781								11.75
		18.4128				286.833								22.25
		48.3459				73.6514								2.5
		34.8238				350.508								3.75
		32.5414				130.589								6.5
		27.5436				260.331								7.25
		35.2406				68.8589								8
		32.7138				229.064								8.75
		25.7516				286.246								14.25
		27.3685				276.83								13
		27.9932				88.9477								10.75
		44.0035				272.934								10.25
		29.8399				572.046								9.75
		21.9029				283.479								9.75
		19.8691				312.117								9.5
		22.5674				114.247								5.75
		35.3364				220.032								3.25
		37.8859				362.198								3.25
		34.4542				274.672								4.5
		56.0557				370.383								5.5
		41.8259				966.961								7.25
		43.2183				501.911								8.25
		49.3443				529.424								9
		29.149				160.369								10
		32.3606				131.171								10.25
		40.8469				331.697								10.5
		39.9123				428.893								10.75
		43.9453				399.123								11.5
		29.795				241.699								12
		35.2128				342.642								12.25
		59.1603				316.915								17.25
						488.073
Number of values	75	107		Number of values	73	108						Number of values	75	107
Minimum	0.9881	8.755		Minimum	29.49	45.38						Minimum	0.4488	2
25% Percentile	19.96	25.5		25% Percentile	138.6	152.3						25% Percentile	5.25	5.75
Median	23.64	32.79		Median	179.7	282.7						Median	7	8.75
75% Percentile	29.82	40.85		75% Percentile	234.3	427.4						75% Percentile	9.5	12
Maximum	47.97	75.8		Maximum	488.6	967						Maximum	21.25	23.75
Mean	25.41	34.11		Mean	196.3	321.8						Mean	7.795	9.208
Std. Deviation	9.028	12.82		Std. Deviation	94.65	205.1						Std. Deviation	3.857	4.501
Std. Error of Mean	1.042	1.239		Std. Error of Mean	11.08	19.73						Std. Error of Mean	0.4453	0.4351
