# Supplementary material for: Plexin-B2 controls the timing of differentiation and the motility of cerebellar granule neurons
Source: eLife journal article supplement (doi:10.7554/elife.60554), 2021-06-08

**A**

Pax6 DAPI

DAPI

Pax6

*Plxnb2<sup>fl/fl</sup>* DIV2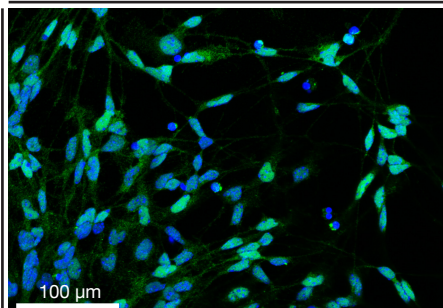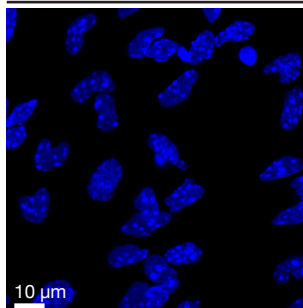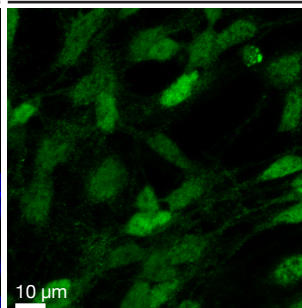

■ *Plxnb2<sup>fl/fl</sup>*  
□ *En1<sup>Cre</sup>;Plxnb2<sup>fl/fl</sup>*

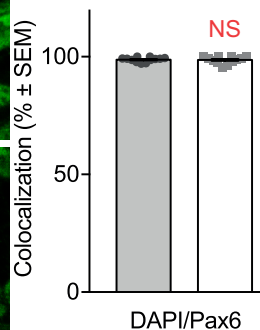*En1<sup>Cre</sup>;Plxnb2<sup>fl/fl</sup>* DIV2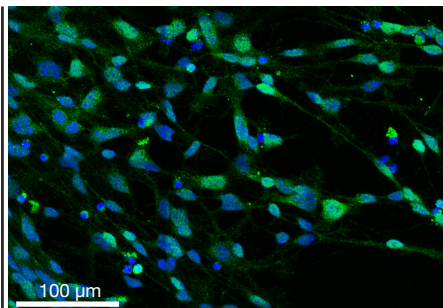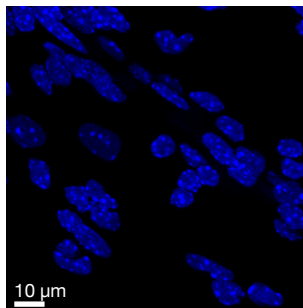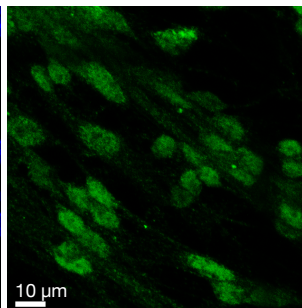**B**

GFAP DAPI

GFAP

*Plxnb2<sup>fl/fl</sup>* DIV2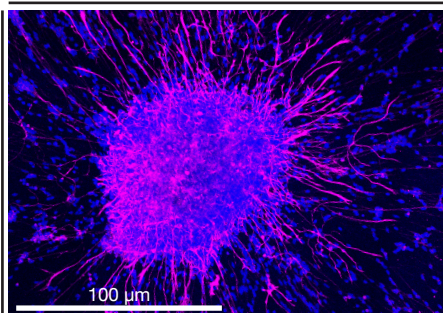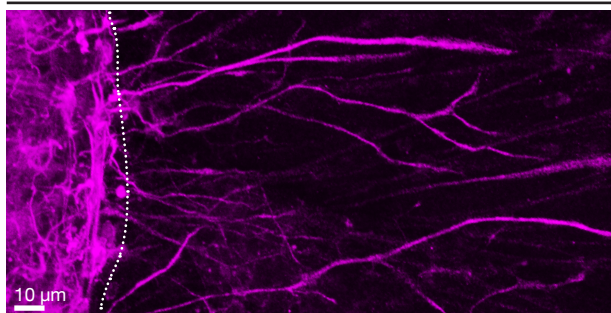

Supplement: supp [file elife-60554-supp-v1.zip]
