# Supplementary figures and images for: Plexin-B2 controls the timing of differentiation and the motility of cerebellar granule neurons
Source: eLife journal article supplement (doi:10.7554/elife.60554), 2021-06-08

**A**

GFP CaBP Myelin DAPI

*En1<sup>Cre</sup>;Plxnb2<sup>fl/fl</sup>* P7-P30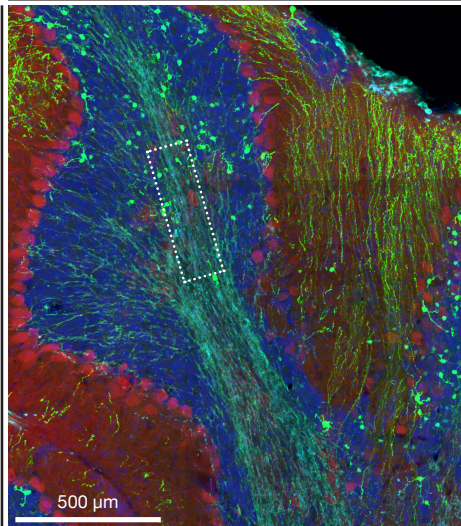**B**

GFP CaBP Myelin

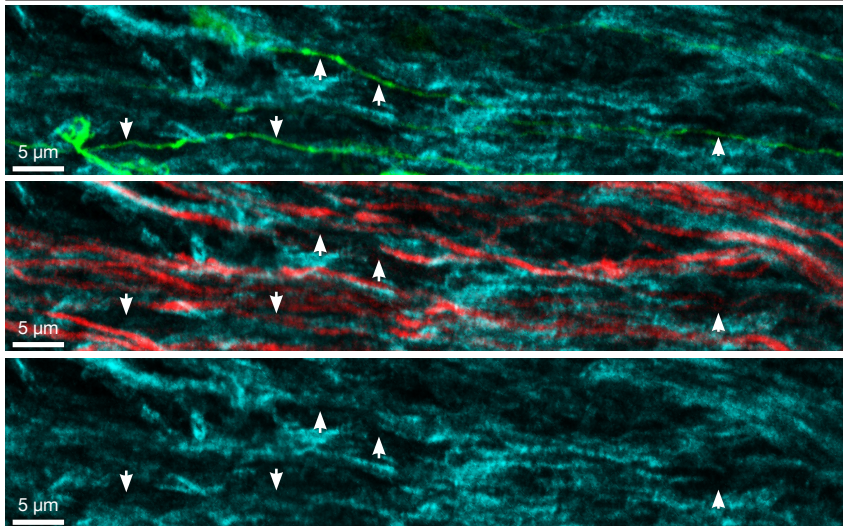

Supplement: supp [file elife-60554-supp-v1.zip]

**A**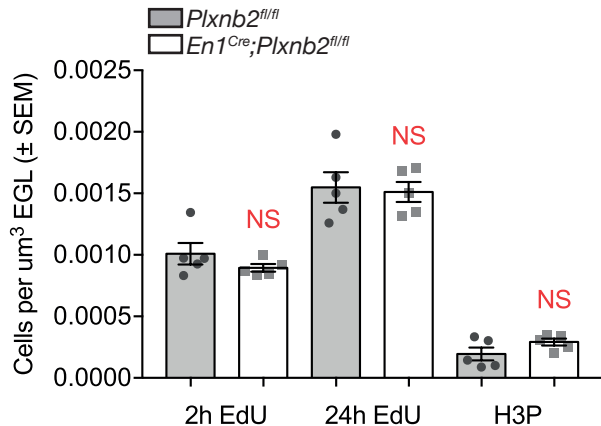**B**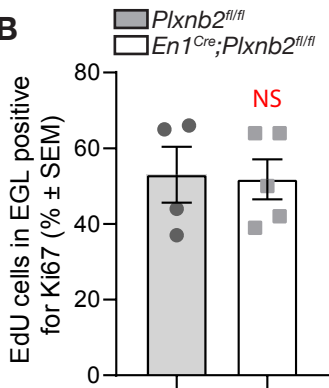

Supplement: supp [file elife-60554-supp-v1.zip]

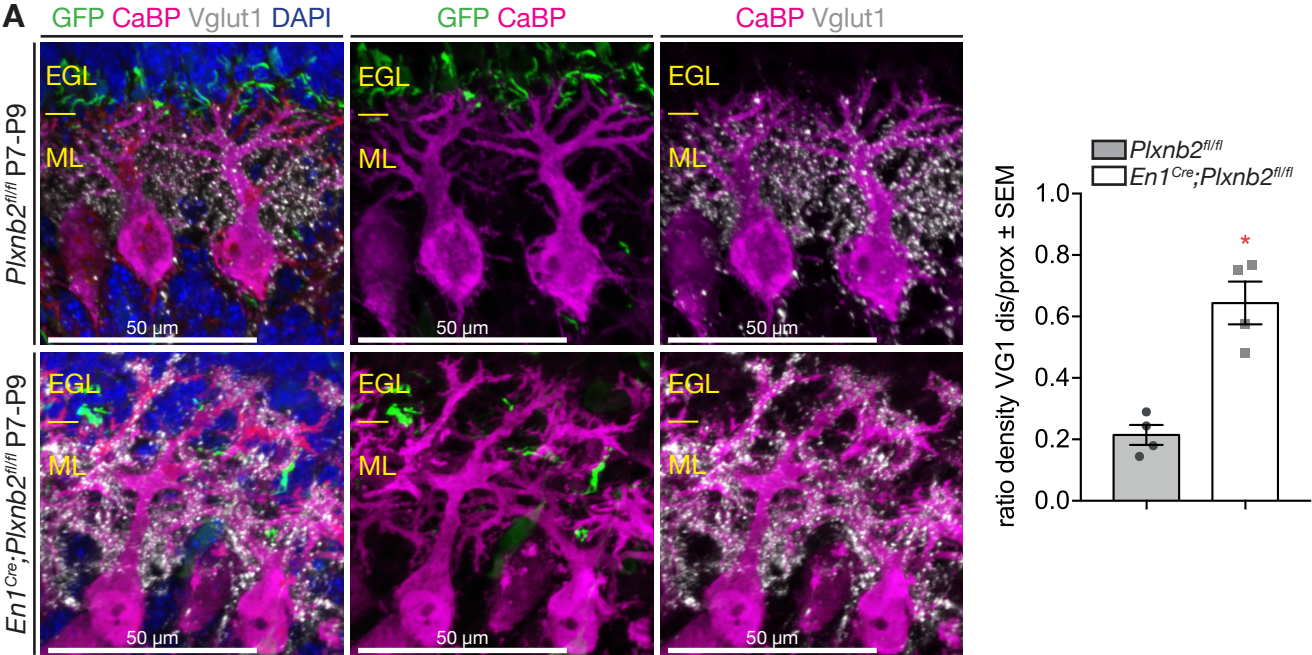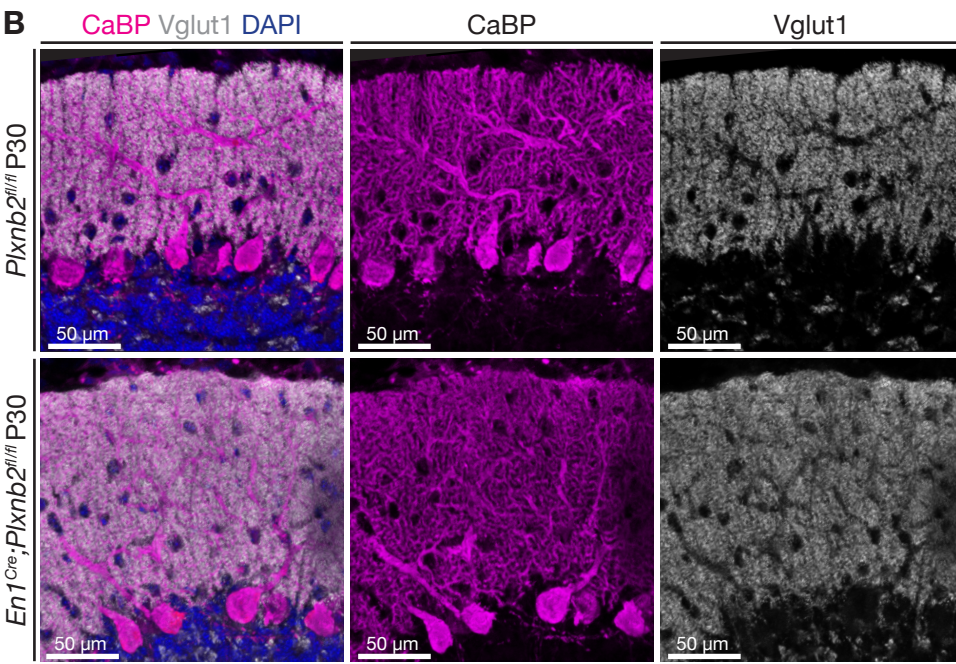

Supplement: supp [file elife-60554-supp-v1.zip]

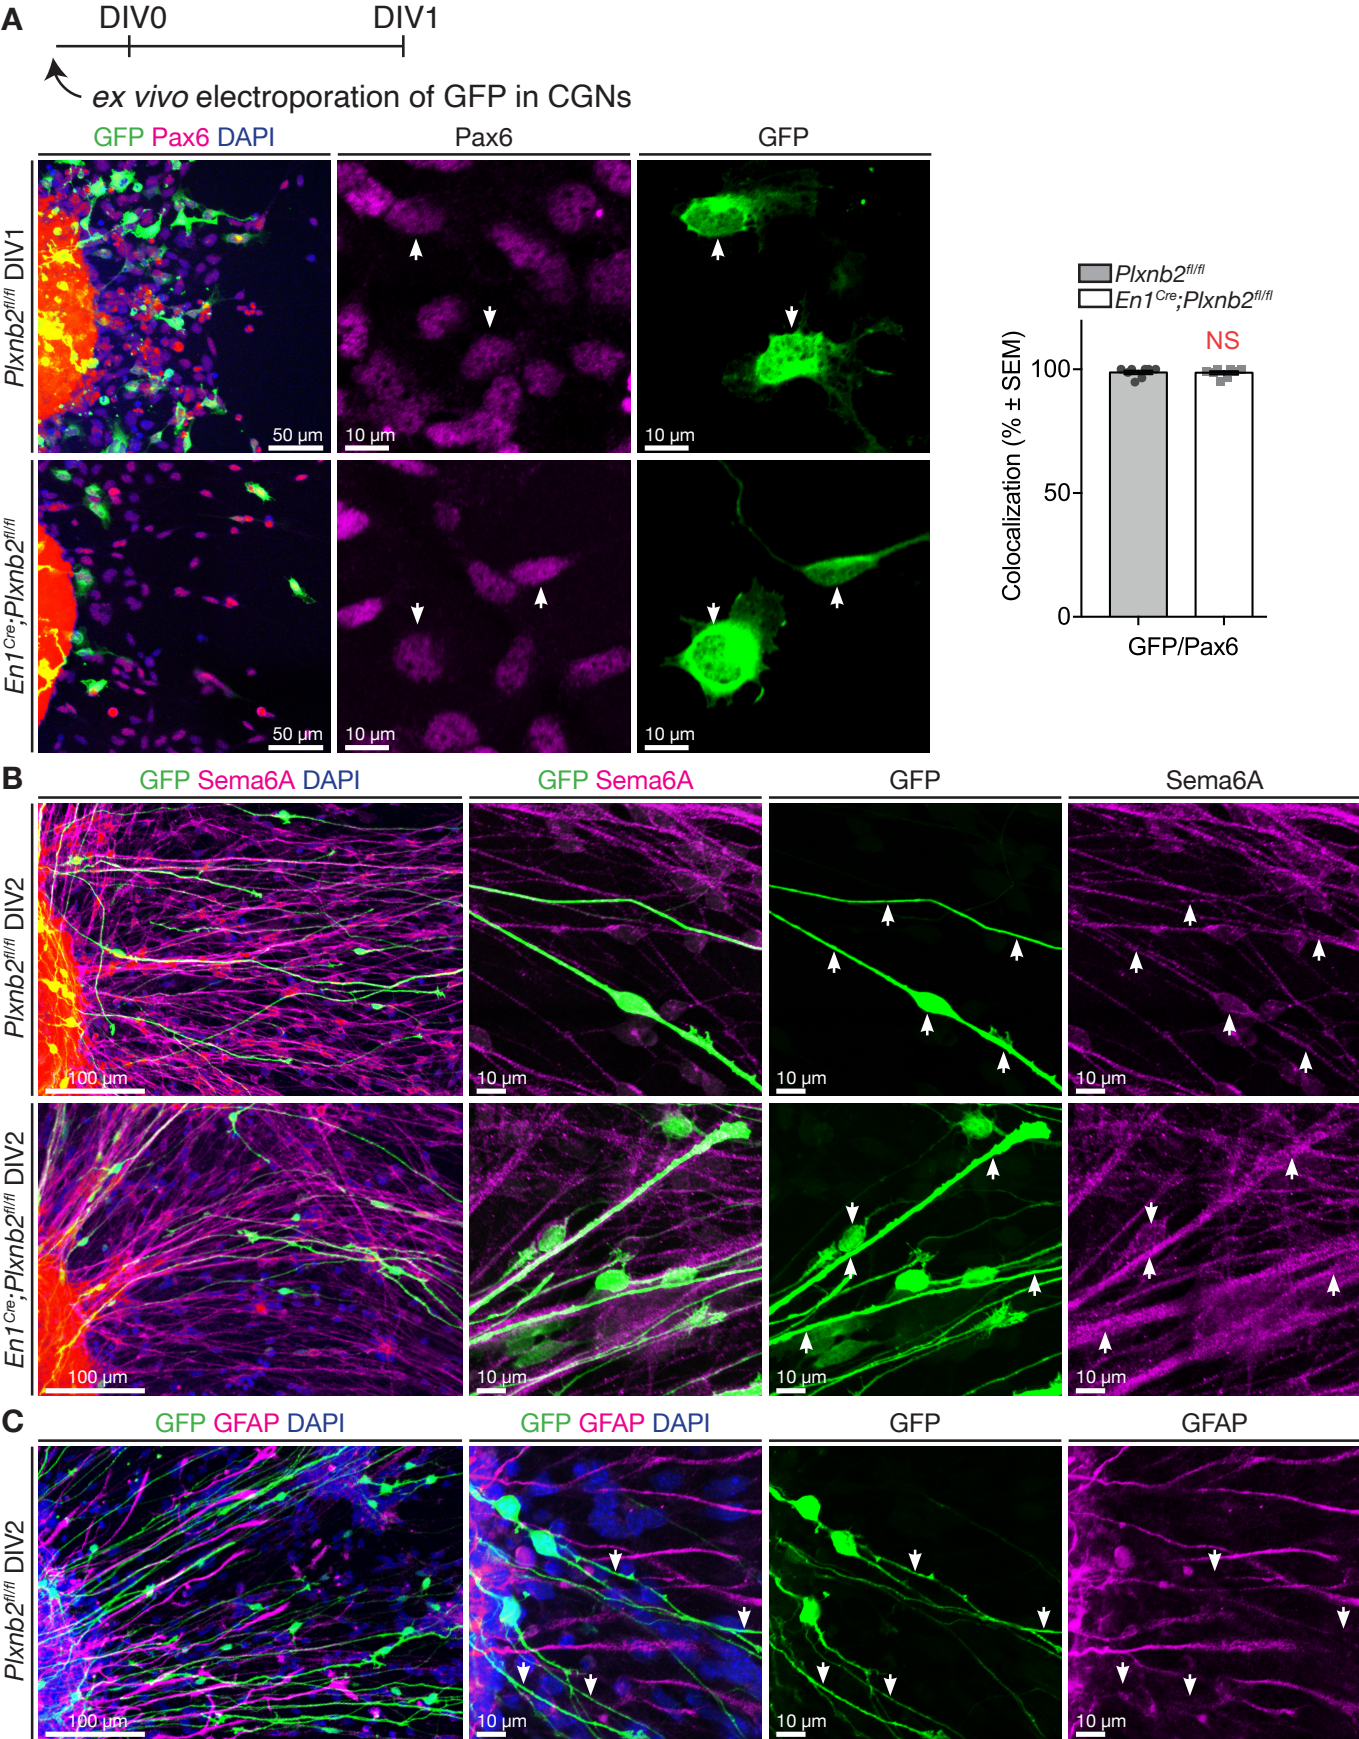

Supplement: supp [file elife-60554-supp-v1.zip]

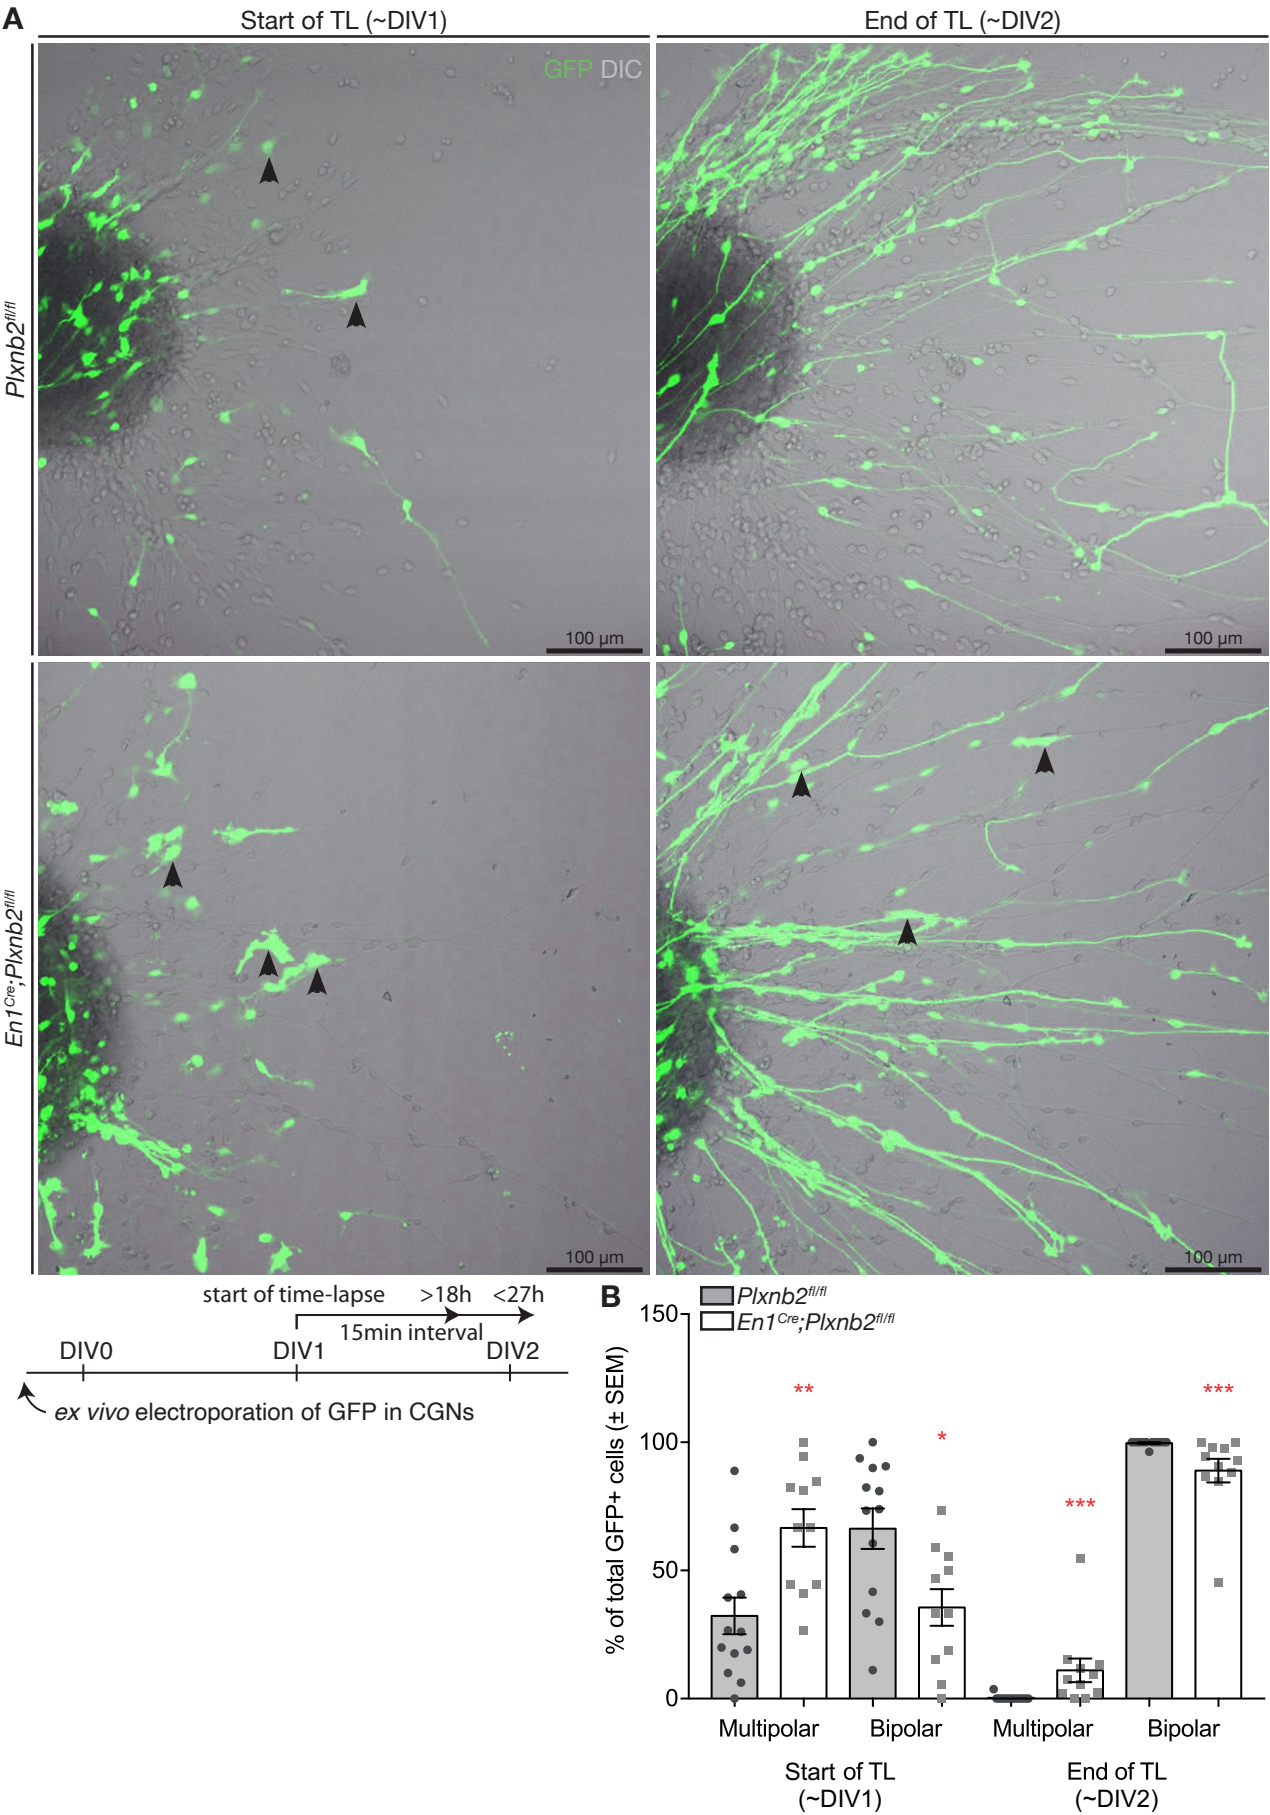

Supplement: supp [file elife-60554-supp-v1.zip]

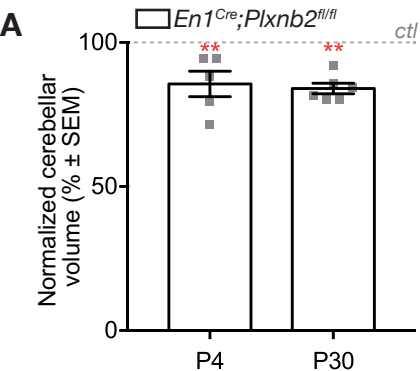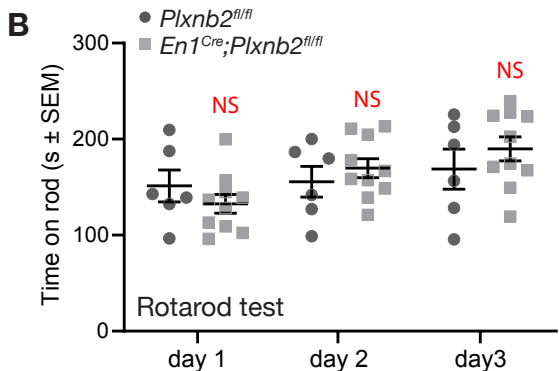

Supplement: supp [file elife-60554-supp-v1.zip]

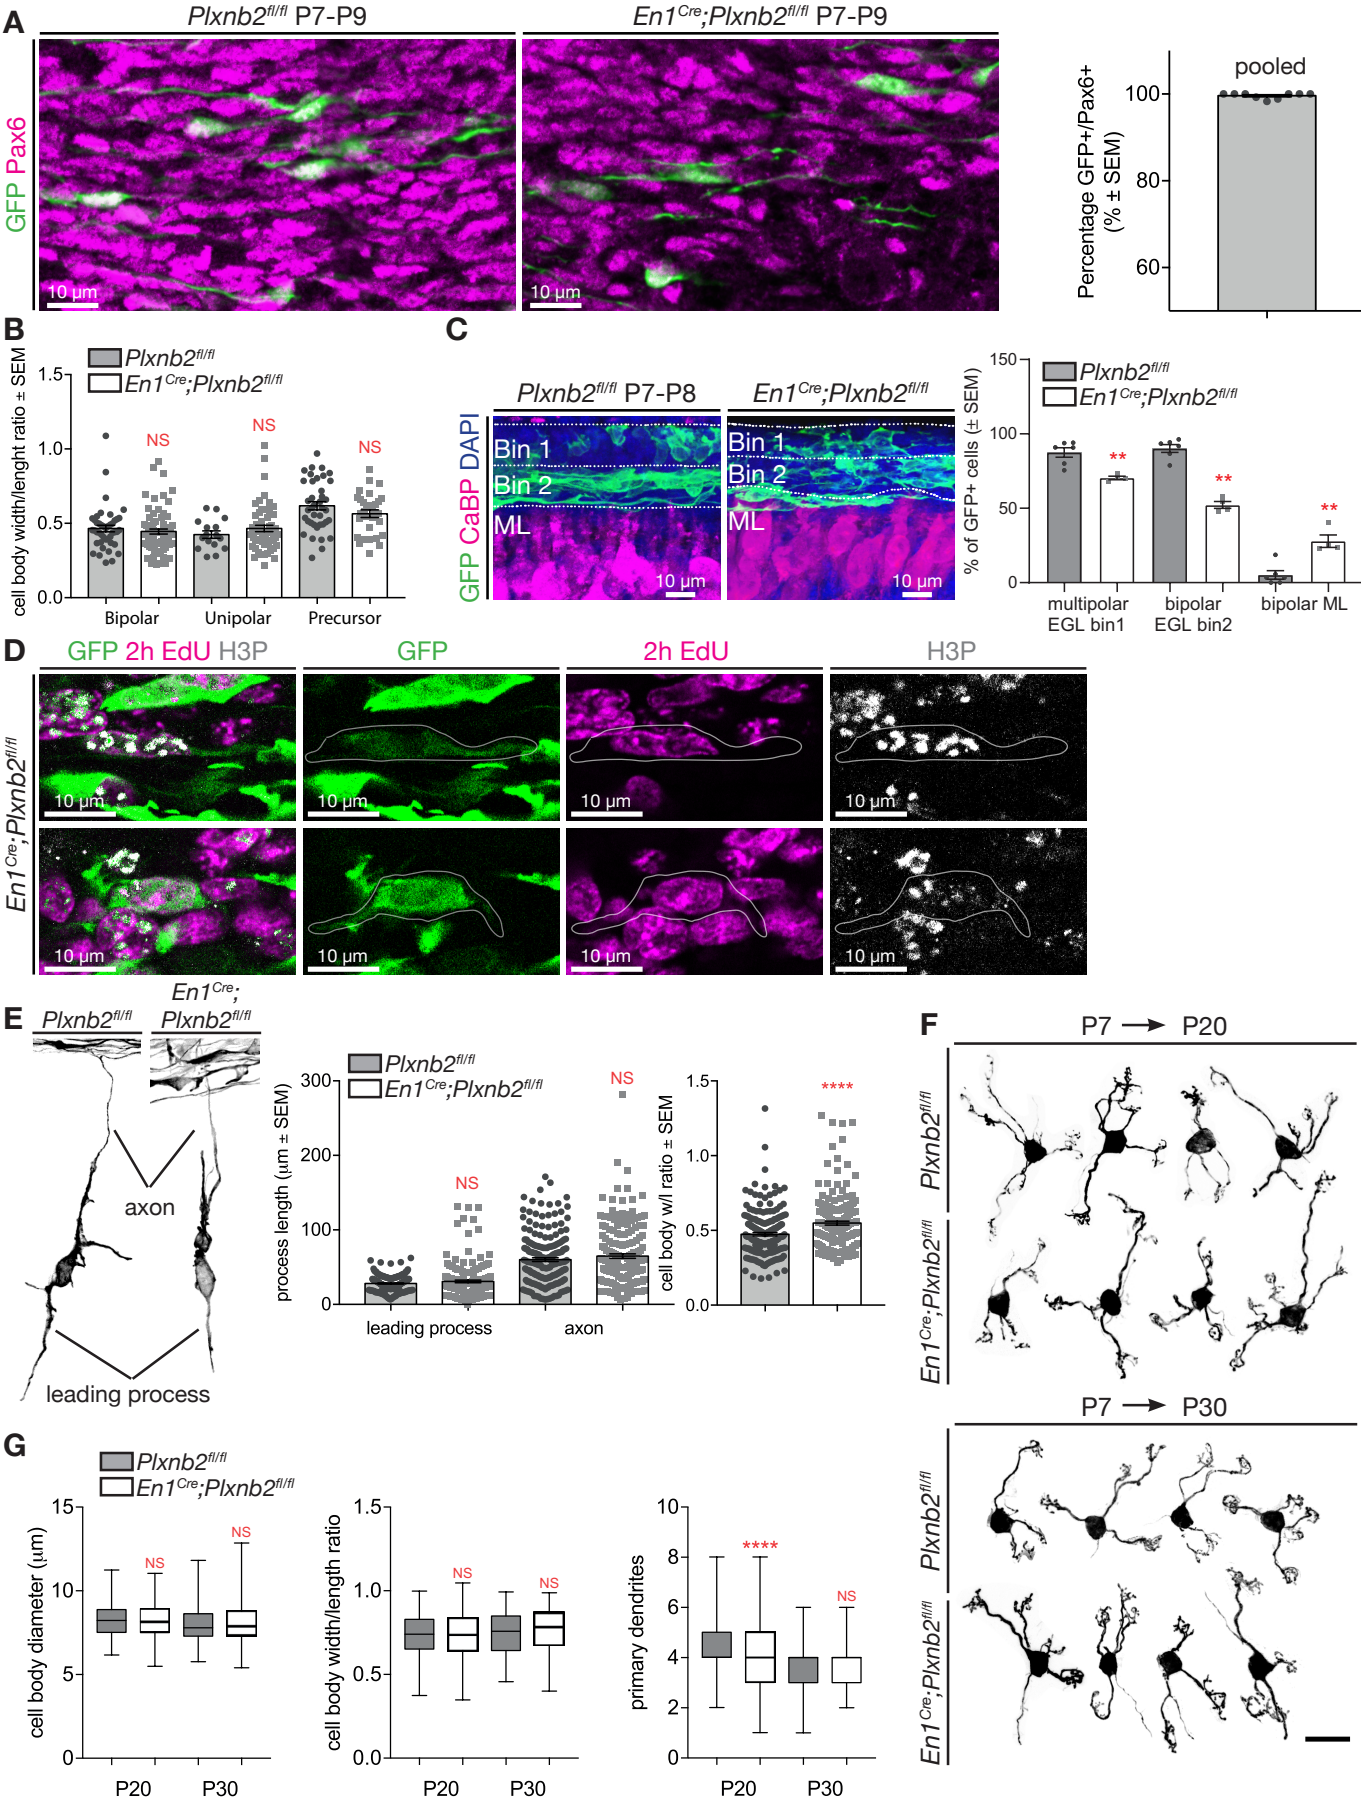

Supplement: supp [file elife-60554-supp-v1.zip]
